1 COVER PAGE

2

3 Photoperiod-dependent developmental reprogramming  
4 of the transcriptional response to seawater entry in  
5 Atlantic salmon (*Salmo salar*)

6 Short title: seawater sensitive gill transcriptome

7 Marianne Iversen<sup>1</sup>, Teshome Mulugeta<sup>2</sup>, Alexander West<sup>1</sup>, Even Jørgensen<sup>1</sup>, Samuel A. M.  
8 Martin<sup>3</sup>, Simen Rød Sandve<sup>4</sup> and David Hazlerigg<sup>1\*</sup>

9 <sup>1</sup>*Department of Arctic and Marine Biology, UiT -The Arctic University of Norway, Tromsø NO-*  
10 *9037, Norway*

11 <sup>2</sup>*Department of Animal and Aquaculture Sciences, Norwegian University of Life Sciences, Ås NO-*  
12 *1432*

13 <sup>3</sup>*School of Biological Sciences, University of Aberdeen, Aberdeen AB24 2TZ, UK*

14 <sup>4</sup>*Centre for Integrative Genetics, Department of Animal and Aquaculture Sciences, Norwegian*  
15 *University of Life Sciences, Ås NO-1432*

16 \* Author for correspondence ([david.hazlerigg@uit.no](mailto:david.hazlerigg@uit.no))

17

18 **Keywords:** smoltification, smolting, osmoregulation, gills, Atlantic salmon, photoperiod, NFAT5,  
19 glucocorticoid

20 **Abstract**

21 The developmental transition of juvenile salmon from a freshwater resident morph (parr) to a  
22 seawater (SW) migratory morph (smolt) requires a range of physiological adaptations, including  
23 the capacity to hypo-osmoregulate. This process, known as smolting, involves both  
24 photoperiod-dependent preparative changes before SW is encountered, and activational  
25 changes stimulated by exposure to SW. To explore the relationship between these two aspects  
26 we undertook experiments in which physiological and transcriptomic responses to SW-challenge  
27 were assessed in fish that had experienced different histories of photoperiodic exposure.  
28 Compared to fish held on constant light (LL), exposure to short photoperiod (SP) dramatically  
29 impaired hypo-osmoregulation in SW, and was associated with extensive glucocorticoid-related  
30 changes in gill gene expression. Additionally, a major effect of photoperiodic history was  
31 observed in the transcriptional response of LL-acclimated fish to SW, with the response profiles  
32 of fish held on LL throughout life being quite distinctive from those of fish which had  
33 experienced an 8 week period of exposure to SP prior to return to LL (SPLL). These differences in  
34 profile likely reflect a diminishing role for NFAT-mediated responses in SPLL fish, as pathways  
35 linked to acute changes in cellular tonicity or intracellular calcium levels decline in importance  
36 with preparation for SW.

## 37 1. Introduction

38 The gill is the primary site of osmo-sensing and osmoregulatory control in fish (D. H. Evans,  
39 Piermarini, & Choe, 2005; T. G. Evans, 2010). In both freshwater (FW) and seawater (SW),  
40 osmoregulatory systems work to counter the passive diffusion of ions and water across the gill  
41 membranes, and balance plasma osmolality. Euryhaline fish species are defined by their ability  
42 to tolerate salinity changes through modulation of osmoregulatory function. In most cases this  
43 depends on responses to altered salinity (acclimation), while in a few species groups including  
44 salmonids and eels (g. *Anguilla*), sustained migrations between sea and freshwater are  
45 facilitated by preparative changes in osmoregulatory function, forming part of a key  
46 developmental life history transition (Folmar & Dickhoff, 1980; Kalujnaia et al., 2007; S. O.  
47 Stefansson, Björnsson, Ebbesson, & McCormick, 2008; Jonathan Mark Wilson, Antunes, Bouça,  
48 & Coimbra, 2004).

49 In Atlantic salmon (*Salmo salar*) this preparatory process is commonly known as ‘smoltification’  
50 or, hereafter, ‘smolting’. Smolting is photoperiodically controlled so that migration to sea occurs  
51 in a spring ‘smolt window’, when conditions favour juvenile growth (Gross, Coleman, &  
52 McDowall, 1988). Smolting requires fish to have previously exceeded a certain size threshold  
53 and is presumed to relate to the capacity of juvenile fish to meet the necessary metabolic  
54 demands (Higgins, 1985; Kristinsson, Saunders, & Wiggs, 1985; Metcalfe, Huntingford, &  
55 Thorpe, 1988; Skilbrei, 1991). During smolting the juvenile salmon develop traits that will enable  
56 them to survive in and exploit the marine environment. The increase of photoperiod in spring  
57 induces a hormonal cascade influencing behavior, metabolism, growth, pigmentation and gill  
58 physiology (Duston & Saunders, 1990; Stephen D. McCormick, 1994; Stephen D. McCormick,

59 Hansen, Quinn, & Saunders, 1998; Stephen D. McCormick, Shrimpton, Moriyama, & Björnsson,  
60 2007). In particular, gill physiology changes in order to accommodate the expected shift in  
61 environmental salinity and osmotic drive (D. H. Evans et al., 2005; Kiilerich, Kristiansen, &  
62 Madsen, 2007; Nilsen et al., 2007; Pisam, Prunet, Boeuf, & Jrambourg, 1988; Tipsmark et al.,  
63 2009). The mitochondria rich cell (MRC), situated on the gill lamella, is a significant component  
64 of osmoregulation (Jonathan M. Wilson & Laurent, 2002). The MRC is rich in ion transporters,  
65 and change in both morphology and composition in response to salinity (Hiroi & McCormick,  
66 2012; Hwang & Lee, 2007; Hwang, Lee, & Lin, 2011; Madsen, Kiilerich, & Tipsmark, 2009; Pisam  
67 et al., 1988). Completion of the smolting process requires entry to sea, where SW exposure  
68 triggers the final shifts in physiology and behavior (Lubin, Rourke, & Bradley, 1989; Stephen D.  
69 McCormick, Regish, Christensen, & Björnsson, 2013; Nilsen et al., 2007; Pisam et al., 1988).  
70 Hence, smolting can be considered a two-step process: a FW preparative phase followed by a  
71 SW activational phase.

72 While the role of photoperiod in timing of preparative changes is well described, less is known  
73 about the final changes triggered in smolts during the first few days in SW (Handeland, Berge,  
74 Björnsson, Lie, & Stefansson, 2000; Handeland, Jarvi, Ferno, & Stefansson, 1996; Prunet &  
75 Boeuf, 1985; S. O. Stefansson et al., 2008), which we will refer to as the SW activational phase.  
76 SW responses are also triggered in juveniles entering SW prematurely, which have not initiated  
77 or finished the preparative phase of smolt development (Saunders, Henderson, & Harmon,  
78 1985; Stagg, Talbot, Eddy, & Williams, 1989). Triggers may in all cases include osmotic stress due  
79 to the hyper-osmotic SW environment as well as direct responses to changes in the  
80 concentrations of specific ions (T. G. Evans, 2010; Tyler G. Evans & Somero, 2008; Kültz, 2012).

81 However, the specific response is expected to differ drastically between SW-ready smolts and  
82 unprepared juveniles (Houde et al., 2018; Stagg et al., 1989). The importance of SW-exposure  
83 for completion of the smolting process and establishment of a SW phenotype is clearly  
84 demonstrated by the process of 'de-smoltification', which occurs if migration to SW is  
85 prevented and involves a loss of tolerance to SW (Arnesen et al., 2003; Sigurd Olav Stefansson,  
86 Berge, & Gunnarsson, 1998).

87 Gill tissue may perceive exposure to SW in at least three possible ways: i) increased cellular  
88 tonicity and altered intracellular ion concentrations ii) via cell surface receptors for SW  
89 constituents (e.g.  $\text{Ca}^{2+}$  perceived via the calcium-sensing receptor, CaSR ) (Kültz, 2012; Loretz,  
90 2008) and iii) indirectly via hormonal signals (e.g. cortisol, or angiotensin II) which change in  
91 response to SW-exposure (Kültz, 2012; Stephen D. McCormick, 2001). In this context, the  
92 'nuclear factor of activated T-cells' (NFAT) family of transcription factors have been the focus of  
93 recent interest because of their implication in osmo-sensing and in  $\text{Ca}^{2+}$ -dependent  
94 transcriptional control (Cheung & Ko, 2013; Hogan, Chen, Nardone, & Rao, 2003; Lorgen,  
95 Jorgensen, Jordan, Martin, & Hazlerigg, 2017; Putney, 2012). The NFAT family comprises four  
96 subgroups, where groups 1-4 (NFATs c1, c2, c3, c4) are  $\text{Ca}^{2+}$ -stimulated, and the fifth, NFAT5, is  
97 regulated in response to extracellular tonicity (Cheung & Ko, 2013; Macian, 2005; Rao, Luo, &  
98 Hogan, 1997). All members share a Rel-like homology domain, and bind to similar binding sites  
99 in the regulatory region of numerous genes (Macian, 2005).

100 NFAT5 (also known as osmotic response element binding protein, OREBP, or tonicity-responsive  
101 enhancer binding protein, TonEBP), is considered the primordial NFAT, as it is the only one  
102 found outside the vertebrate group (Hogan et al., 2003). NFAT5 regulates the transcription of

103 tonicity-responsive genes such as ion transporters and osmo-protective proteins (Cheung & Ko,  
104 2013; Woo, Lee, & Kwon, 2002; Zhou, Ferraris, & Burg, 2006). Hypertonic stress increases  
105 nuclear import and retention of NFAT5 through changes in phosphorylation state, while  
106 hypotonic stress leads to nuclear export (Cheung & Ko, 2013; Ferraris et al., 2002; Irrazabal et  
107 al., 2010; Macian, 2005).

108 Two recent studies in salmon focus attention on the role of NFAT signaling during smolting.  
109 Lorgen et al. (2015) showed that the salmonid thyroid hormone deiodinase *dio2a* was SW-  
110 inducible in gill tissue, and its promoter region was enriched for osmotic response elements  
111 (OREs / NFAT5 response elements). A subsequent survey of NFAT5 expression in Atlantic  
112 salmon (Lorgen et al., 2017) revealed four NFAT5 paralogues, NFAT5 a1 and a2, and NFAT5 b1  
113 and b2. Of these, NFAT5b1/2 gill expression was highly induced by SW exposure. Together these  
114 studies suggest that NFAT5b1/2 could coordinate SW stimulated changes in transcription.

115 In the present study we sought to extend the previous work on smolting and NFATs to consider  
116 the breadth of transcriptional response to SW-exposure in the salmon gill, and to evaluate the  
117 extent to which this response relies on NFAT mediated transcriptional control. Our data  
118 demonstrate that while NFAT involvement can clearly be seen in the transcriptional response,  
119 the importance of this depends to a large degree on the photoperiod to which fish have been  
120 acclimated, and the history of prior photoperiodic exposure.

121

122

## 123 2. Materials & Methods

### 124 2.1 Fish rearing and animal welfare

125 Atlantic salmon (*Salmo salar*, Linnaeus, 1758) of the Aquagene commercial strain (Trondheim,  
126 Norway), hatched and raised (continuous light, LL, >200 lux, 10°C) as part of the ongoing smolt  
127 production at Tromsø Aquaculture Research Station (TARS) were used in this experiment. Fish  
128 were fed continuously and in excess with pelleted salmon feed (Skretting, Stavanger, Norway).

129 TARS is approved by the Norwegian Animal Research Authority (NARA) for hold of, and  
130 experiments on salmonids, fresh- and salt-water fish and marine invertebrates. When  
131 experimental conditions are limited to practices which are undertaken routinely as part of the  
132 recognized animal husbandry, with no compromise to welfare, additional formal approval of the  
133 experimental protocol by NARA is not required. This is in accordance with Norwegian and  
134 European legislation on animal research.

### 135 2.2 Experimental set-up

136 The experimental design is presented in fig. 1A.

137 Juvenile salmon, kept in a 500 l circular tank since start of feeding, and at approximately 7  
138 months of age were used for this experiment. A baseline sampling was performed on day 1 of  
139 the experiment (mean weight 49.5 g, s.d.  $\pm$  7.0 g, n=6); this is referred to as pre-SP. On day 3,  
140 225 juvenile salmon were taken from the original tank and randomly split into two groups of 75  
141 and 150 fish, which were placed in two 100 l circular tanks in separate rooms (FW, 8.5°C). The  
142 group of 75 fish were kept on LL for the rest of the experiment. For the group of 150 fish,  
143 photoperiod was incrementally reduced from LL to SP (8-h light/16-h dark). Both groups were

144 sampled on day 32 and 53 (n=6 for each treatment). On day 60, half of the remaining fish under  
145 SP were moved to a new 100 l circular tank and returned to LL (SPLL). All three groups were  
146 then sampled on days 68, 89 and 110 (n=6 for each treatment). During the experiment the fish  
147 were fed continuously and in excess over the eight hours corresponding to day in the SP  
148 treatment group.

149 At each sampling point a subsample of fish from each of the treatments were put through a 24-  
150 h salt-water challenge (SWC, 100 l tanks, 34 ‰, salinity, 7°C, n=6 for each treatment), starting  
151 on the day prior to sampling. The fish were not fed during SWC.

### 152 2.3 Sampling procedure

153 Fish were netted out from their respective treatments (including SWC fish) in groups of six.  
154 Following anesthesia body mass ( $\pm 0.5$  g) and fork length ( $\pm 0.1$  cm) was measured. Blood was  
155 drained from the caudal vein into 2mL lithium-heparinized vacutainers (BD vacutainers®, Puls  
156 Norge, Moss, Norway), and placed on ice until further processing. This was followed by  
157 decapitation. The operculum was removed from the right side of the head (caudal view), and a  
158 gill arch dissected out. The primary gill filaments were cut from the arch and placed in  
159 RNAlater® (Sigma-Aldrich, St. Louis, Missouri, USA) for later processing. Samples were stored at  
160 4 °C for 24 h, and then kept frozen at -80°C until further processing.

161 Blood samples were centrifuged at 6000 x g for 10 minutes, and the plasma fraction collected.  
162 The plasma was stored at -20°C until later analysis of osmolality could take place. Thawed  
163 plasma samples were analysed for osmolyte content using a Fiske One-Ten Osmometer (Fiske  
164 Associates, Massachusetts, USA,  $\pm 4$  mOsm kg<sup>-1</sup>).



## 165 2.4 RNA extractions and sequencing

166 Total RNA was extracted applying a TRIzol-based method following the recommended protocol  
167 from the manufacturer (Invitrogen, Thermo Fisher, Waltham, Massachusetts, USA). A NanoDrop  
168 spectrophotometer (NanoDrop Technologies, Wilmington, Delaware, USA) was used to check  
169 RNA concentration and quality. RNA integrity was confirmed using the Agilent 2100 Bioanalyzer  
170 (Agilent Technologies, Santa Clara, CA, USA). RNA was frozen at -80°C until further analysis.

171 Sequencing libraries (n=167) were prepared with the TruSeq Stranded mRNA HS kit (Illumina,  
172 San Diego, California, USA). The 2100 Bioanalyzer using the DNA 1000 kit (Agilent Technologies,  
173 Santa Clara, California, USA) was used to determine mean library length, while the Qbit BR kit  
174 (Thermo Scientific, Waltham, Massachusetts, USA) was used to determine library  
175 concentrations. Samples were barcoded using Illumina unique indexes. Single-end 100 bp  
176 sequencing of samples was carried out at the Norwegian Sequencing Centre (University of Oslo,  
177 Oslo, Norway), using an Illumina HiSeq 2500.

178 Removal of sequencing adapters and short sequencing reads (parameters `-q 20 -O 8 -`  
179 `minimum-length 40`), and trimming of low-quality bases were done using Cutadapt (ver. 1.8.1)  
180 (Martin, 2011). Quality control was performed with FastQC software (Andrews, 2010; Andrews,  
181 Lindenbaum, Howard, & Ewels, 2011-2014). Mapping of reads onto the reference genome was  
182 performed with STAR software (ver. 2.4.2a) (Dobin et al., 2013). Read counts for annotated  
183 genes was generated with HTSEQ-count software (ver. 0.6.1p1) (Anders, Pyl, & Huber, 2015). All  
184 sequences have been deposited in Array Express, EBI under accession number E-MTAB-8276.

## 185 2.5 Transcriptome analysis

186 All transcriptome analysis were performed in R (ver. 3.4.2), using RStudio (ver. 1.0.153).

187 In order to identify genes that were differentially expressed between the FW and SW sampled  
188 fish in the three different treatment groups over the three later time points the R-package Edge  
189 R (ver. 3.14.0) was applied. Raw counts were filtered (expression threshold CPM>1 in five or  
190 more libraries), and scaled applying trimmed means of M-values (TMM) scaling. A quasi-  
191 likelihood negative binomial generalized log-linear model was used to fit the data, and nine  
192 empirical Bayes F-tests were run contrasting between the FW and SW sampled fish for each  
193 condition for days 68, 89 and 110 (T4.LL.SW-T4.LL.FW, T4.SP.SW-T4.SP.FW, T4.SPLL.SW-  
194 T4.SPLL.FW, etc.). Outputs were filtered requiring a false discovery rate (FDR) of 0.01, and a  
195  $\log_2$ -fold change of  $|1|$ .

196 Principal component analysis (PCA) was performed on the full transcriptome using The R Stats  
197 Package (stats, ver. 3.4.2) (Love, Huber, & Anders, 2014). Only the three latter sampling points  
198 (days 68, 89 and 110) were included in the PCA. For simplicity and interpretability of the plot,  
199 TMM normalized counts for each gene in each sample group (n=6, except for T4 SPLL FW where  
200 n=5) were averaged before generating the PCA plot.

201 Lists of differentially expressed genes (DEGs) from each of the sampling groups were compared  
202 across time within treatments, and between treatments at the same time point. The numbers of  
203 unique and shared DEGs are summarized in the 'Upset'-plots (UpSetR ver. 1.4.0) (Conway, Lex,  
204 & Gehlenborg, 2017) in fig. 2.

205 A gene ontology analysis was performed on the same DEG-lists, using topGO (ver. 2.24.0) and  
206 the annotation package for the salmon genome Ssa.RefSeq.db (ver. 1.2), with a gill specific gene  
207 universe. Fisher statistics and the 'elim'-algorithm (Alexa, Rahnenführer, & Lengauer, 2006) was  
208 applied, with a significance threshold of  $p < 0.05$  for enrichment. Only the top 150 GO terms  
209 were included in the output. Visualization of the GO enrichment using GOplot (ver. 1.0.2)  
210 (Walter, Sánchez-Cabo, & Ricote, 2015) and ggplot2 (ver. 3.0.0). GOplot was used to generate  
211 the plotting object and z-scores for each GO term (eq.1) that indicate if the trend is towards up-  
212 or downregulation of the specific term. The sign of the log2-fold score defines the direction of  
213 regulation for each gene. Before plotting unique GO IDs were filtered for a count >5. R-package  
214 ggplot2 (ver. 3.0.0) was used for plotting the GO plots, setting a threshold where adjusted p-  
215 value <0.0001, or the number of genes annotated to that term >150 for labelling terms in the  
216 plot.

217 **Equation 1**

$$z - score = \frac{(\#upregulated\ genes - \#downregulated\ genes)}{\sqrt{Total\ number\ of\ genes}}$$

218

219 From the set of expressed genes (CPM > 1 in five or more libraries), 18 genes could be identified  
220 as NFAT (5), NFAT-like (12) or NFAT-interacting genes (1) based on their SalmoBase annotation  
221 (ICSASG\_v2) (Lien et al., 2016; Samy et al., 2017). Raw count data was used to calculate mean  
222 gene expression at each sampling point for all three treatments. The gene expression of the SP  
223 treatment group was then hierarchically clustered using the R-package pheatmap (ver. 1.0.10)

224 (row scaled by z-scores, applying Euclidian distance measures and complete linkage clustering).

225 The resulting order and clustering of genes was then forced onto heatmap of the LL and SPLL  
226 groups in order to produce figure 3.

## 227 2.6 Motif analysis

228 Motif enrichment analysis was performed using SalMotifDB-shiny tool (<https://cigene.no/tools/>)  
229 (Mulugeta et al., 2019). This tool accesses a database containing over 19,000 predicted  
230 transcription factor binding sites (TFBSs) found in the proximal promoter regions (-  
231 1,000/+200bp from TSS) of salmonid genes. We used the motif enrichment analysis utility of this  
232 tool to screen for enrichment of NFAT and glucocorticoid response element (GRE) motifs in lists  
233 of DEGs at the T6 sampling point.

## 234 2.7 Datasharing

235 All relevant data can be found within the MS and its supporting information, further the  
236 full transcriptomics dataset is accessible in the ArrayExpress depository, with  
237 accession number E-MTAB-8276.

238

## 239 3. Results

### 240 3.1 Hypoosmoregulatory capacity

241 Throughout the study (fig. 1A), fish held on LL upheld the capacity to maintain undisturbed  
242 plasma osmolality levels during a 24-h SW challenge (no significant effect of time,  $P > 0.05$ , 1-  
243 way ANOVA) (fig. 1B). In fish maintained on SP, hypo-osmoregulatory capacity was initially  
244 reduced compared to day 1 in LL ( $P < 0.0001$  by t-test). As SP exposure extended beyond 8 weeks  
245 these fish underwent a partial recovery of hypo-osmoregulatory capacity. Fish that were  
246 returned to LL after 8 weeks of SP exposure (SPLL) regained their osmoregulatory capacity  
247 within the first four weeks (fig. 1B). Plasma osmolality values of the SPLL group after one week  
248 back on LL (T4) were similar to values in SP control fish at the same time point, after which a  
249 dramatic improvement in hypo-osmoregulatory capacity was observed (fig. 1B). Eight weeks  
250 after return to LL (T6), plasma osmolality values of the SPLL group were 4.2 % lower than in  
251 corresponding LL control fish and 9.1 % lower than day 1 values.

### 252 3.2 RNA profile of the gill response to SW-challenge

253 To explore treatment effects on the overall RNA expression profile of the gills we performed a  
254 PCA analysis (fig. 2A). The first component separated samples by photoperiodic history and  
255 sampling time (40% variation explained, PC1) while the second component separated the FW  
256 from the SW-challenged fish (30% variation explained, PC2). On the PC1 axis the largest  
257 separation of data points was between early (T4, one week after re-entry to LL) and late (T5 and  
258 T6, 4 and 8 weeks after re-entering LL) sampling points for SPLL fish. This contrasted with low  
259 PC1 resolution for samples from fish in either the LL or SP control groups. The PC2 separation  
260 was most pronounced in SP control fish and less so in LL control fish. For the SP and LL groups

261 divergence along PC2 appear independent of time. Contrastingly, in SPLL fish, PC2 resolution  
262 was dependent on time of sampling with major segregation between FW and SW samples at T4,  
263 one week after re-entering LL, while at both later time points resolution between FW and SW  
264 samples was greatly reduced. Overall the PCA analysis indicates that return to LL after SP  
265 exposure triggers changes in the gill transcriptome which mirror the improved hypo-  
266 osmoregulatory efficiency.

267 To further investigate the effect of photoperiodic history on SW-responsiveness, we compared  
268 lists of SW-DEGs (FDR < 0.01, fold-change > |1|, supplemental material S1) for the 3 photoperiod  
269 groups (Fig. 2B, C, ). At the end of the study (T6) we found some 10-fold more SW-DEGs in SP  
270 fish than in either the LL or SPLL groups. Separate gene ontology enrichment tests were  
271 performed for genes responding to SW exposure at T6 in the three photoperiod treatments  
272 (supplemental material S3 through S6). Enriched ontologies for SP fish included up-regulated  
273 transcripts associated with chromatin silencing and suppression of transcription (e.g. histone  
274 deacetylase 5, transcriptional repressor p66, NFAT5; GO:0000122 '*negative regulation of*  
275 *transcription by RNA polymerase 2*'), and also with formation of stress granules, indicative of  
276 translational arrest due to cellular stress (Anderson & Kedersha, 2008) (e.g. ddx6, ddx3x, roquin  
277 1; GO:0010494, '*stress granule*').

278 Only 51 SW-DEGs (i.e. about 5% of the SP set) were shared across all three photoperiod  
279 treatments, and this shared group included genes involved in mitochondrial respiration (e.g.  
280 cytochrome P450 subunits, hexokinase-1), presumably reflecting the energy demand imposed  
281 by SW challenge. Correspondingly, the only significantly over-represented BP GO-term shared

282 across the photoperiod treatments was GO:0000302, '*response to reactive oxygen species*',  
283 encompassing six of the shared genes (fig. 2D).

284 While there is a similar number of SW-DEGs at T6 in the LL and SPLL treatments (150 and 125  
285 genes, respectively), the overlap between these two groups was almost entirely limited to the  
286 universally responsive energy-related genes described above. LL-specific SW-DEGs at T6 were  
287 mainly associated with metabolism and cell signaling (f. ex. GO: 0009749 '*response to glucose*',  
288 GO:0051591 '*response to cAMP*'). In contrast to the SP and LL groups, the SPLL group had a  
289 dramatic reduction in DEGs in response to SW between T4 and T6 (Figure 2C). Within the group  
290 of SW-induced genes unique to SPLL at the T6 time-point, the inward rectifying K<sup>+</sup> channels  
291 KCNJ1 and KCNJ5 and 'junctional cadherin 5 associated' (JCAD, also know as KIAA1462) were the  
292 most strongly induced transcripts (supplemental material S2).

### 293 3.3 Effects of SW on the expression of NFAT family members

294 The highly divergent transcriptional responses to SW, including the presence of NFAT5 only in  
295 the list of SP-specific DEGs led us to explore further the regulation of expression among all  
296 members of the NFAT family of transcription factors (fig. 3, supplemental material S7 and S8).  
297 Clustering of response patterns across this gene family gave four distinctive patterns of  
298 regulation, represented by the four profile plots in fig 3. The NFAT5b cluster (fig. 3, second  
299 cluster from the top) showed strong, SP-specific SW-induction, while weaker SP-specific SW-  
300 induction of expression was also seen in the cluster typified by NFAT4c (LOC106600383) (fig. 3,  
301 first cluster from the top), but only evident at earlier sampling points (T4, T5). Contrastingly,  
302 genes typified by NFAT3c (LOC106561519) showed reduced expression in SW (fig. 3, third

303 cluster from the top). The last cluster of genes were largely SW-unresponsive across the study  
304 as a whole (fig. 3, fourth cluster from the top).

### 305 3.4 Enrichment for NFAT- and GRE-response motifs in SW-DEGs

306 We used MotifDb ((Mulugeta et al., 2019) (<https://salmobase.org/apps/SalMotifDB/>) to  
307 determine how NFAT response elements are associated with SW-induced changes in gene  
308 expression (fig. 4A), focusing on changes occurring at the last sampling point (T6, day 110) of the  
309 experiment. This revealed enrichment of seven non-redundant motifs, of which four are  
310 associated with SW-induced gene expression changes, in the LL control fish ( $p \leq 0.001$ ). Three  
311 response elements were enriched in the SP control fish. No enrichment of NFAT elements was  
312 seen in SPLL fish at this sampling point. We also looked at presence of glucocorticoid receptor  
313 response elements (GREs, fig. 4B) due to the stress response indicated by GO-terms in the SP  
314 group, and confirmed that these were only enriched among the SW-response genes in the SP-  
315 group (fig. 4B).

## 316 4. Discussion

317 The present study characterizes the effect of photoperiod (SP vs LL) and photoperiodic history  
318 (SPLL vs LL) on the gill response to SW exposure in juvenile Atlantic salmon. SP exposure  
319 dramatically impairs the ability of juvenile salmon to hypo-osmoregulate in SW and is associated  
320 with extensive changes in gill gene expression (fig. 2), including genes predicted to be regulated  
321 by the glucocorticoid pathway (fig. 4B), indicative of cellular stress. Contrastingly, exposure of LL  
322 acclimated fish to SW does not result in osmoregulatory failure over 24-h, and is associated with  
323 less extensive changes in gill gene expression (fig. 2). Nevertheless, a major effect of  
324 photoperiodic history was observed in the transcriptional response of LL acclimated fish to SW,



325 with the response profiles of fish held on LL throughout life being quite distinctive from those  
326 fish which had experienced an 8 week period of exposure to SP prior to return to LL. The  
327 diminished role of NFAT transcriptional regulation in the SW response of SPLL fish observed  
328 through reduced motif enrichment analysis (fig. 4A) suggests that preparative effects of SP  
329 exposure reduce the involvement of pathways linked to changes in cellular tonicity or  
330 intracellular calcium levels in the response to SW.

331 Previous work by Lorgen et al. (2015; 2017) showed that in the gill the SW-induced gene *dio2a* is  
332 enriched for NFAT5 response-elements, and that expression of both *dio2a* and NFAT5b is SW-  
333 induced in SP-acclimated Atlantic salmon juveniles. Our RNAseq analysis confirms these  
334 findings, showing that strongest SW-induction of NFAT5b is indeed seen in SP acclimated fish, as  
335 well as implicating NFAT4 and NFATc3 in the response. Given that this is the case, it is  
336 somewhat surprising that statistical enrichment for NFAT motifs is less pronounced within the  
337 SW-induced transcriptome of SP fish than in LL fish. We believe this may reflect a swamping of  
338 signal by large numbers of genes induced through stress-activated pathways, including but  
339 probably not limited to the adrenal corticoid axis revealed by GRE enrichment in SW-induced  
340 genes in SP fish. In support of this interpretation the subset of SW-induced genes shared  
341 between fish in the LL and SP T6 groups, which constitutes less than 10% of the overall SP SW-  
342 induced group (but about half of the LL SW-induced group) is highly enriched for NFAT5  
343 elements ( $p < 0.01$ ).

344 Despite the superficial similarity observed between the LL and SPLL fish in ability to hypo-  
345 osmoregulate (fig. 1B) as well as the magnitude of transcriptional responses to SW exposure  
346 (fig. 2), it is clear from the GO analysis that the SW-responses of fish in these two groups are

347 quite distinctive. We suggest that the marked enrichment of NFAT-response elements, and in  
348 particular NFAT5, in the LL group reflects a transient activation of NFAT5-responsive genes in  
349 response to SW. By contrast, in the SPLL group there is no motif enrichment for NFAT5 nor the  
350  $\text{Ca}^{2+}$ -regulated NFATs. We interpret this lack of NFAT5 responses in SPLL as evidence for NFAT5-  
351 signaling playing a role in the activation of hypo-osmoregulation in salmon which have not  
352 developed a SW migratory phenotype. Accordingly, exposure to SP for 8 weeks prior to re-  
353 exposure to LL stimulates pre-adaptation and obviates the need for NFAT-mediated responses  
354 to SW exposure – presumably because even in the initial phase of SW exposure, pre-adapted gill  
355 cells do not experience significant changes in tonicity or intracellular  $\text{Ca}^{2+}$  levels.

356 The transcriptional response of the NFAT family was not limited to NFAT5b since we also  
357 observed SW-induction of NFATc1 and c4 in the SP group, and photoperiodic history-dependent  
358 SW-suppression of NFATc3 and NFATc1 paralogous pairs in the SP and SPLL groups. In  
359 mammals, these calcium-regulated NFAT's play important roles in immune function, but also in  
360 the development, differentiation and function of various other cell types such as osteoclast and  
361 cardiac tissue (Ames, Valdor, Abe, & Macian, 2016; Hogan et al., 2003; Macian, 2005). Changes  
362 in intracellular calcium leading to NFAT activation may conceivably arise as a result of  $\text{Ca}^{2+}$   
363 production as a second messenger within the cell, or as a result of  $\text{Ca}^{2+}$  entry from the  
364 environment – and both these pathways are likely to be involved in osmosensing (Kültz, 2012).

365 In addition, extracellular  $\text{Ca}^{2+}$  may affect gill function through the G-protein coupled calcium  
366 sensing receptor (CaSR), expressed in the MRCs and proposed to function as a salinity sensor in  
367 fish (Loretz, 2008; Loretz, Pollina, Hyodo, & Takei, 2009; Nearing et al., 2002). While CaSR signal  
368 transduction has primarily been linked to cAMP-dependent signal transduction, the possibility

369 of cross-talk with NFAT pathways is suggested by work on TNF secretion in the mammalian  
370 kidney tubule (Abdullah et al., 2006; Gong & Hou, 2014).

371 Our results clearly show that NFATs are playing a minor role in SW regulated transcriptional  
372 responses in SPLL fish compared to LL and SP. This is consistent with a model where the  
373 photoperiodic treatment received (SPLL) is known to stimulate a range of smolt characteristics  
374 including improved long-term performance in SW (Berge et al., 1995; S. D. McCormick et al.,  
375 1995; Stephen D. McCormick et al., 2007; Saunders et al., 1985; S. O. Stefansson et al., 1991; S.  
376 O. Stefansson et al., 2008). With the exception of day 68 (i.e. the first week after return to LL  
377 from SP, when these fish are in a transitional state), there is no SW-induction of NFAT5b-  
378 expression or any other NFATs, nor is there any enrichment of NFAT-motifs in the SW-  
379 responsive transcriptome. Nevertheless, a small number of genes were uniquely stimulated by  
380 SW in the SPLL group. These included the inward rectifying potassium channel genes KCNJ1 and  
381 KCNJ5, the former being ATP-regulated and the latter being G-protein regulated (Clapham,  
382 1994; Ho et al., 1993; Krapivinsky et al., 1995). Also, we find the cardiac regulatory gene  
383 junctional protein associated with coronary artery disease, known as JCAD. The potassium  
384 channels have been identified as key markers for SW adaptation in eels, where they have been  
385 found to be expressed in MRCs (Suzuki et al., 1999; Tse, Au, & Wong, 2006). JCAD is predicted to  
386 play a role in endothelial cell junctions (Akashi, Higashi, Masuda, Komori, & Furuse, 2011) and  
387 has been linked to the Hippo signaling pathway (Jones et al., 2018), which regulates cell  
388 proliferation and apoptosis (Halder & Johnson, 2011). Both KCNJ1 and JCAD show high SW-  
389 inducibility after being exposed to the photoperiod-induced smolting (S2), and they therefore  
390 represent the final activational response to SW occurring specifically in fish that have completed

391 a FW preparative phase in response to photoperiod. Further studies to understand the impact  
392 of these genes on gill function in SW are now warranted.

### 393 References

394 Abdullah, H. I., Pedraza, P. L., Hao, S., Rodland, K. D., McGiff, J. C., & Ferreri, N. R. (2006). NFAT  
395 regulates calcium-sensing receptor-mediated TNF production. *American Journal of*  
396 *Physiology-Renal Physiology*, 290(5), F1110-F1117. Retrieved from  
397 <https://www.physiology.org/doi/abs/10.1152/ajprenal.00223.2005>

398 <https://www.physiology.org/doi/pdf/10.1152/ajprenal.00223.2005>.

399 doi:10.1152/ajprenal.00223.2005

400 Akashi, M., Higashi, T., Masuda, S., Komori, T., & Furuse, M. (2011). A coronary artery disease-  
401 associated gene product, JCAD/KIAA1462, is a novel component of endothelial cell-cell  
402 junctions. *Biochemical and Biophysical Research Communications*, 413(2), 224-229.

403 Retrieved from <http://www.sciencedirect.com/science/article/pii/S0006291X11014732>.

404 doi:<https://doi.org/10.1016/j.bbrc.2011.08.073>

405 Alexa, A., Rahnenführer, J., & Lengauer, T. (2006). Improved scoring of functional groups from  
406 gene expression data by decorrelating GO graph structure. *Bioinformatics*, 22(13), 1600-  
407 1607. Retrieved from <https://doi.org/10.1093/bioinformatics/btl140>.

408 doi:10.1093/bioinformatics/btl140

409 Ames, R. Y., Valdor, R., Abe, B. T., & Macian, F. (2016). NFAT. *Encyclopedia of Signaling Molecules*,  
410 1-8. Retrieved from [https://link.springer.com/content/pdf/10.1007/978-1-4614-6438-  
411 9\\_141-1.pdf](https://link.springer.com/content/pdf/10.1007/978-1-4614-6438-9_141-1.pdf).

412 Anders, S., Pyl, P. T., & Huber, W. (2015). HTSeq--a Python framework to work with high-  
413 throughput sequencing data. *Bioinformatics (Oxford, England)*, 31(2), 166-169. Retrieved  
414 from <https://www.ncbi.nlm.nih.gov/pubmed/25260700>

415 <https://www.ncbi.nlm.nih.gov/pmc/PMC4287950/>. doi:10.1093/bioinformatics/btu638

416 Anderson, P., & Kedersha, N. (2008). Stress granules: the Tao of RNA triage. *Trends in Biochemical*  
417 *Sciences*, 33(3), 141-150. Retrieved from

418 <http://www.sciencedirect.com/science/article/pii/S0968000408000261>.

419 doi:<https://doi.org/10.1016/j.tibs.2007.12.003>

420 Andrews, S. (2010). FastQC: a quality control tool for high throughput sequence data. Retrieved  
421 from <http://www.bioinformatics.babraham.ac.uk/projects/fastqc>

422 Andrews, S., Lindenbaum, P., Howard, B., & Ewels, P. (2011-2014). FastQC High Throughput  
423 Sequence QC Report. Retrieved from [www.bioinformatics.babraham.ac.uk/projects/](http://www.bioinformatics.babraham.ac.uk/projects/)

424 Arnesen, A. M., Toften, H., Agustsson, T., Stefansson, S. O., Handeland, S. O., & Björnsson, B. T.  
425 (2003). Osmoregulation, feed intake, growth and growth hormone levels in 0+ Atlantic  
426 salmon (*Salmo salar* L.) transferred to seawater at different stages of smolt development.  
427 *Aquaculture*, 222(1), 167-187. Retrieved from

428 <http://www.sciencedirect.com/science/article/pii/S0044848603001091>

429 <https://ac.els-cdn.com/S0044848603001091/1-s2.0-S0044848603001091->

430 [main.pdf?tid=03c92d64-2ce3-4e40-aaea-](https://ac.els-cdn.com/S0044848603001091/1-s2.0-S0044848603001091-main.pdf?tid=03c92d64-2ce3-4e40-aaea-)

- 431 [4b47bfb7ada2&acdnat=1551948471\\_0a34a5edb799053576a54ca2d670cd92](https://doi.org/10.1139/f95-024).  
432 doi:[https://doi.org/10.1016/S0044-8486\(03\)00109-1](https://doi.org/10.1016/S0044-8486(03)00109-1)
- 433 Berge, A. I., Berg, A., Fyhn, H. J., Barnung, T., Hansen, T., & Stefansson, S. O. (1995). Development  
434 of salinity tolerance in underyearling smolts of Atlantic salmon (*Salmo salar*) reared under  
435 different photoperiods. *Canadian Journal of Fisheries and Aquatic Sciences*, 52(2), 243-  
436 251. Retrieved from <Go to ISI>://WOS:A1995RM82500002
- 437 <https://www.nrcresearchpress.com/doi/10.1139/f95-024>. doi:10.1139/f95-024
- 438 Cheung, C. Y. K., & Ko, B. C. B. (2013). NFAT5 in cellular adaptation to hypertonic stress –  
439 regulations and functional significance. *Journal of Molecular Signaling*, 8(1), 5. Retrieved  
440 from <https://doi.org/10.1186/1750-2187-8-5>
- 441 <https://www.ncbi.nlm.nih.gov/pmc/articles/PMC3655004/pdf/1750-2187-8-5.pdf>.  
442 doi:10.1186/1750-2187-8-5
- 443 Clapham, D. E. (1994). Direct G Protein Activation of Ion Channels? *Annual Review of*  
444 *Neuroscience*, 17(1), 441-464. Retrieved from  
445 <https://www.annualreviews.org/doi/abs/10.1146/annurev.ne.17.030194.002301>
- 446 <https://www.annualreviews.org/doi/10.1146/annurev.ne.17.030194.002301>.  
447 doi:10.1146/annurev.ne.17.030194.002301
- 448 Conway, J. R., Lex, A., & Gehlenborg, N. (2017). UpSetR: an R package for the visualization of  
449 intersecting sets and their properties. *Bioinformatics*, 33(18), 2938-2940. Retrieved from  
450 <https://doi.org/10.1093/bioinformatics/btx364>
- 451 <https://www.ncbi.nlm.nih.gov/pmc/articles/PMC5870712/pdf/btx364.pdf>.  
452 doi:10.1093/bioinformatics/btx364
- 453 Dobin, A., Davis, C. A., Schlesinger, F., Drenkow, J., Zaleski, C., Jha, S., . . . Gingeras, T. R. (2013).  
454 STAR: ultrafast universal RNA-seq aligner. *Bioinformatics (Oxford, England)*, 29(1), 15-21.  
455 Retrieved from <https://www.ncbi.nlm.nih.gov/pubmed/23104886>
- 456 <https://www.ncbi.nlm.nih.gov/pmc/PMC3530905/>. doi:10.1093/bioinformatics/bts635
- 457 Duston, J., & Saunders, R. L. (1990). The entrainment role of photoperiod on hypoosmoregulatory  
458 and growth-related aspects of smolting in Atlantic salmon (*Salmo salar*). *Can. J. Zool.*,  
459 68(4), 707-715. Retrieved from <https://doi.org/10.1139/z90-103>
- 460 <http://www.nrcresearchpress.com/doi/pdfplus/10.1139/z90-103>. doi:10.1139/z90-103
- 461 Evans, D. H., Piermarini, P. M., & Choe, K. P. (2005). The Multifunctional Fish Gill: Dominant Site  
462 of Gas Exchange, Osmoregulation, Acid-Base Regulation, and Excretion of Nitrogenous  
463 Waste. *Physiol. Rev.*, 85(1), 97-177. Retrieved from  
464 <https://www.physiology.org/doi/abs/10.1152/physrev.00050.2003>.  
465 doi:10.1152/physrev.00050.2003
- 466 Evans, T. G. (2010). Co-ordination of osmotic stress responses through osmosensing and signal  
467 transduction events in fishes. *Journal of Fish Biology*, 76(8), 1903-1925. Retrieved from  
468 <https://onlinelibrary.wiley.com/doi/abs/10.1111/j.1095-8649.2010.02590.x>.  
469 doi:10.1111/j.1095-8649.2010.02590.x
- 470 Evans, T. G., & Somero, G. N. (2008). A microarray-based transcriptomic time-course of hyper-  
471 and hypo-osmotic stress signaling events in the euryhaline fish <em>Gillichthys

- 472 mirabilis</em>: osmosensors to effectors. *Journal of Experimental Biology*, 211(22), 3636-  
473 3649. Retrieved from <http://jeb.biologists.org/content/jexbio/211/22/3636.full.pdf>.  
474 doi:10.1242/jeb.022160
- 475 Ferraris, J. D., Williams, C. K., Persaud, P., Zhang, Z., Chen, Y., & Burg, M. B. (2002). Activity of the  
476 TonEBP/OREBP transactivation domain varies directly with extracellular NaCl  
477 concentration. *Proceedings of the National Academy of Sciences*, 99(2), 739-744.  
478 Retrieved from <https://www.pnas.org/content/pnas/99/2/739.full.pdf>.  
479 doi:10.1073/pnas.241637298
- 480 Folmar, L. C., & Dickhoff, W. W. (1980). The parr—Smolt transformation (smoltification) and  
481 seawater adaptation in salmonids: A review of selected literature. *Aquaculture*, 21(1), 1-  
482 37.
- 483 Gong, Y., & Hou, J. (2014). Claudin-14 Underlies Ca<sup>++</sup>-Sensing Receptor–Mediated Ca<sup>++</sup>  
484 Metabolism via NFAT-microRNA–Based Mechanisms. *Journal of the American Society of*  
485 *Nephrology*, 25(4), 745-760. Retrieved from  
486 <https://jasn.asnjournals.org/content/jnephrol/25/4/745.full.pdf>.  
487 doi:10.1681/asn.2013050553
- 488 Gross, M. R., Coleman, R. M., & McDowall, R. M. (1988). Aquatic Productivity and the Evolution of  
489 Diadromous Fish Migration. *Science*, 239(4845), 1291-1293. Retrieved from  
490 <http://science.sciencemag.org/content/sci/239/4845/1291.full.pdf>  
491 <http://science.sciencemag.org/content/239/4845/1291.long>.  
492 doi:10.1126/science.239.4845.1291
- 493 Halder, G., & Johnson, R. L. (2011). Hippo signaling: growth control and beyond. *Development*,  
494 138(1), 9-22. Retrieved from <https://dev.biologists.org/content/develop/138/1/9.full.pdf>.  
495 doi:10.1242/dev.045500
- 496 Handeland, S. O., Berge, Å., Björnsson, B. T., Lie, Ø., & Stefansson, S. O. (2000). Seawater  
497 adaptation by out-of-season Atlantic salmon (*Salmo salar* L.) smolts at different  
498 temperatures. *Aquaculture*, 181(3), 377-396. Retrieved from  
499 <http://www.sciencedirect.com/science/article/pii/S0044848699002410>  
500 [https://ac.els-cdn.com/S0044848699002410/1-s2.0-S0044848699002410-](https://ac.els-cdn.com/S0044848699002410/1-s2.0-S0044848699002410-main.pdf?_tid=b8da6c9d-4767-46d8-a16c-0b1ccdfcd667&acdnat=1551948474_c004eb09efa801cde598e74e61088d15)  
501 [main.pdf?\\_tid=b8da6c9d-4767-46d8-a16c-](https://ac.els-cdn.com/S0044848699002410/1-s2.0-S0044848699002410-main.pdf?_tid=b8da6c9d-4767-46d8-a16c-0b1ccdfcd667&acdnat=1551948474_c004eb09efa801cde598e74e61088d15)  
502 [0b1ccdfcd667&acdnat=1551948474\\_c004eb09efa801cde598e74e61088d15](https://ac.els-cdn.com/S0044848699002410/1-s2.0-S0044848699002410-main.pdf?_tid=b8da6c9d-4767-46d8-a16c-0b1ccdfcd667&acdnat=1551948474_c004eb09efa801cde598e74e61088d15).  
503 doi:[https://doi.org/10.1016/S0044-8486\(99\)00241-0](https://doi.org/10.1016/S0044-8486(99)00241-0)
- 504 Handeland, S. O., Jarvi, T., Ferno, A., & Stefansson, S. O. (1996). Osmotic stress, antipredator  
505 behaviour, and mortality of Atlantic salmon (*Salmo salar*) smolts. *Canadian Journal of*  
506 *Fisheries and Aquatic Sciences*, 53(12), 2673-2680. Retrieved from <Go to  
507 ISI>://WOS:A1996WL12500002  
508 <https://www.nrcresearchpress.com/doi/pdfplus/10.1139/f96-227>. doi:DOI 10.1139/cjfas-53-12-  
509 2673
- 510 Higgins, P. J. (1985). Metabolic differences between Atlantic salmon (*Salmo salar*) parr and  
511 smolts. *Aquaculture*, 45(1), 33-53. Retrieved from  
512 <http://www.sciencedirect.com/science/article/pii/004484868590256X>





556 <http://genesdev.cshlp.org/content/17/18/2205.full.pdf>. doi:10.1101/gad.1102703  
557 Houde, A. L. S., Gunther, O. P., Strohm, J., Ming, T. J., Li, S., Patterson, D. A., . . . Miller, K. M.  
558 (2018). Discovery and validation of candidate smoltification gene expression biomarkers  
559 across multiple species and ecotypes of Pacific salmonids. *bioRxiv*, 474692. Retrieved  
560 from <https://www.biorxiv.org/content/biorxiv/early/2018/11/26/474692.full.pdf>

561 <https://www.biorxiv.org/content/biorxiv/early/2018/12/01/474692.full.pdf>. doi:10.1101/474692  
562 Hwang, P.-P., & Lee, T.-H. (2007). New insights into fish ion regulation and mitochondrion-rich  
563 cells. *Comp. Biochem. Phys. A*, 148(3), 479-497. Retrieved from  
564 <http://www.sciencedirect.com/science/article/pii/S1095643307014663>.  
565 doi:10.1016/j.cbpa.2007.06.416

566 Hwang, P.-P., Lee, T.-H., & Lin, L.-Y. (2011). Ion regulation in fish gills: recent progress in the  
567 cellular and molecular mechanisms. *American Journal of Physiology - Regulatory,*  
568 *Integrative and Comparative Physiology*, 301(1), R28-R47.  
569 doi:10.1152/ajpregu.00047.2011

570 Irarrazabal, C. E., Gallazzini, M., Schnetz, M. P., Kunin, M., Simons, B. L., Williams, C. K., . . .  
571 Ferraris, J. D. (2010). Phospholipase C- $\gamma$ 1 is involved in signaling the activation by high  
572 NaCl of the osmoprotective transcription factor TonEBP/OREBP. *Proceedings of the*  
573 *National Academy of Sciences*, 107(2), 906-911. Retrieved from  
574 <https://www.pnas.org/content/pnas/107/2/906.full.pdf>. doi:10.1073/pnas.0913415107

575 Jones, P. D., Kaiser, M. A., Najafabadi, M. G., Koplev, S., Zhao, Y., Douglas, G., . . . Webb, T. R.  
576 (2018). JCAD, a Gene at the 10p11 Coronary Artery Disease Locus, Regulates Hippo  
577 Signaling in Endothelial Cells. *Arteriosclerosis, Thrombosis, and Vascular Biology*, 38(8),  
578 1711-1722. Retrieved from  
579 <https://www.ahajournals.org/doi/abs/10.1161/ATVBAHA.118.310976>.  
580 doi:doi:10.1161/ATVBAHA.118.310976

581 Kalujnaia, S., McWilliam, I. S., Zaguinaiko, V. A., Feilen, A. L., Nicholson, J., Hazon, N., . . . Cramb,  
582 G. (2007). Salinity adaptation and gene profiling analysis in the European eel (*Anguilla*  
583 *anguilla*) using microarray technology. *General and Comparative Endocrinology*, 152(2),  
584 274-280. Retrieved from  
585 <http://www.sciencedirect.com/science/article/pii/S0016648006003911>

586 <https://pdf.sciencedirectassets.com/272500/1-s2.0-S0016648007X03253/1-s2.0-S0016648006003911/main.pdf?X-Amz-Security-Token=IQoJb3JpZ2luX2VjEEwaCXVzLWVhc3QtMSJFMEMCH3hipuNQf%2F0xQwdM%2BTtVGTLPYax7%2FQKS8wVdbnpCDkClG0ZV4j9mnLFHP7SgmE1TncGFtQVHaHv7uMvJmbZW9byKtACCHQQAhoMMDU5MDAzNTQ2ODY1Igyemsgj%2BsZEJGxjM2MqrQLJ4P%2FYQ%2FBw6d73riwfls34AahRUKRgoNU%2FOt52AjBr7Jzb0aimHU%2BexFK0LKpBjPq84qIRbLBjDUYbZvSDgllciUliNxs2SxfigVVfxYtqvclx1IV2KwMjO7frCNT2F7%2Fpu6v6zfgghSU%2BukwSx1P0mS%2FK%2BltiD1z8YbgAIRRrGMGiKL%2F5Nj4krFjhfg0CQjPavC%2FmsoQ3Xfi00aRsAWBR9uYyUCfsQLWdaJ2RJe8WQ15YNunpi8UwdmxEwA4SrgNQR68zBFoq%2FlvWyzmF3q9cWCrZ%2B19kJ5PMXvgLyTK3iYwb%2Bcemvp2jflTksjVvTWHTkZqoWkE1reVWjUNMsKyp90sDTcVTQ7vgnLsiuMFd8LTDVhyz7oUyAZpcl%2BR%2Fo%2B%2FsfHly%2FSG95yxBxYMNivv%2B4FOtECnuy00Yff%2BBmWDOHLWSEiCRPeTZfKXYI7rh%2FwHpxAe2Ucej4UeFRS%2BSi1vmGJhSNwGB4NPEuEsbRbU2lwi7dZrGyKUzfnfig%2FLDjik9zdDaGabMWABzPoeHzR%2Bis%2B>



599 [2Bkov9kr5QU0Gbs6%2F0Jlr9sHOVKYRq%2FvES92urUp%2BhN3Czkz2dtvdSG7nmz2cmQi1](https://doi.org/10.1016/j.ygcen.2006.12.025)  
600 [N2UmvmE%2FVrT4SggWpGQ%2B5HVhzjB8B1AK4UFFSs3%2FG%2Bp6Eyi7H9Fr8zm7%2Fx](https://doi.org/10.1016/j.ygcen.2006.12.025)  
601 [kG320%2F4e6nMvKbz8RRuR6QbF5hYe0%2Bkac3oHFN5KTR9bk8X8PDIbNobizjb%2Ft%2Bz](https://doi.org/10.1016/j.ygcen.2006.12.025)  
602 [sY%2FbjVcpy3fKn2B2uPy9RpwHf0pwpGcFuNa4i1%2BmKLbxSnpSOEHAtg0bO7N0HQAyof](https://doi.org/10.1016/j.ygcen.2006.12.025)  
603 [EkOjG3%2BAyNMgpCfwrRFtn%2Btcl9fR3GdhHITDFWXncZzpAnElzQSGBVI%2F5n6gqSuchT](https://doi.org/10.1016/j.ygcen.2006.12.025)  
604 [cEfcoc3OVBg%3D%3D&X-Amz-Algorithm=AWS4-HMAC-SHA256&X-Amz-](https://doi.org/10.1016/j.ygcen.2006.12.025)  
605 [Date=20191116T114747Z&X-Amz-SignedHeaders=host&X-Amz-Expires=300&X-Amz-](https://doi.org/10.1016/j.ygcen.2006.12.025)  
606 [Credential=ASIAQ3PHCVTYT4VYTFNG%2F20191116%2Fus-east-](https://doi.org/10.1016/j.ygcen.2006.12.025)  
607 [1%2Fs3%2Faws4\\_request&X-Amz-](https://doi.org/10.1016/j.ygcen.2006.12.025)  
608 [Signature=904360dbfa9b3ae5a81a4e4bdf77f66ff1a2fb31408458943a16f4a52fe6807b&h](https://doi.org/10.1016/j.ygcen.2006.12.025)  
609 [ash=761335496a35537e9029219bacfed506c95935809448a0e556ef9d041c7bbf7e&host](https://doi.org/10.1016/j.ygcen.2006.12.025)  
610 [=68042c943591013ac2b2430a89b270f6af2c76d8dfd086a07176afe7c76c2c61&pii=S0016](https://doi.org/10.1016/j.ygcen.2006.12.025)  
611 [648006003911&tid=pdf-acdf401f-8c7d-4852-b9d0-](https://doi.org/10.1016/j.ygcen.2006.12.025)  
612 [19047a1a90b9&sid=07845a367dafc745a438a261872ce89d5182gxrbq&type=client.](https://doi.org/10.1016/j.ygcen.2006.12.025)  
613 doi:<https://doi.org/10.1016/j.ygcen.2006.12.025>  
614 Kiilerich, P., Kristiansen, K., & Madsen, S. S. (2007). Cortisol regulation of ion transporter mRNA in  
615 Atlantic salmon gill and the effect of salinity on the signaling pathway. *J. Endocrinol.*,  
616 *194*(2), 417-427. Retrieved from [http://joe.endocrinology-](http://joe.endocrinology-journals.org/content/194/2/417.abstract)  
617 [journals.org/content/194/2/417.abstract](http://joe.endocrinology-journals.org/content/194/2/417.abstract)  
618 <https://joe.bioscientifica.com/downloadpdf/journals/joe/194/2/1940417.pdf>. doi:10.1677/joe-  
619 07-0185  
620 Krapivinsky, G., Gordon, E. A., Wickman, K., Velimirović, B., Krapivinsky, L., & Clapham, D. E.  
621 (1995). The G-protein-gated atrial K<sup>+</sup> channel IK<sub>ACh</sub> is a heteromultimer of two inwardly  
622 rectifying K<sup>+</sup>-channel proteins. *Nature*, *374*(6518), 135-141. Retrieved from  
623 <https://doi.org/10.1038/374135a0>. doi:10.1038/374135a0  
624 Kristinsson, J. B., Saunders, R. L., & Wiggs, A. J. (1985). Growth dynamics during the development  
625 of bimodal length-frequency distribution in juvenile Atlantic salmon (*Salmo salar* L.).  
626 *Aquaculture*, *45*(1), 1-20. Retrieved from  
627 <http://www.sciencedirect.com/science/article/pii/0044848685902546>  
628 <http://www.sciencedirect.com/science/article/pii/0044848685902546?via%3Dihub>.  
629 doi:[https://doi.org/10.1016/0044-8486\(85\)90254-6](https://doi.org/10.1016/0044-8486(85)90254-6)  
630 Kültz, D. (2012). The Combinatorial Nature of Osmosensing in Fishes. *Physiology*, *27*(4), 259-275.  
631 Retrieved from <https://www.physiology.org/doi/abs/10.1152/physiol.00014.2012>  
632 <https://www.physiology.org/doi/pdf/10.1152/physiol.00014.2012>.  
633 doi:10.1152/physiol.00014.2012  
634 Lien, S., Koop, B. F., Sandve, S. R., Miller, J. R., Kent, M. P., Nome, T., . . . Davidson, W. S. (2016).  
635 The Atlantic salmon genome provides insights into rediploidization. *Nature*, *533*(7602),  
636 200-+. Retrieved from <Go to ISI>://WOS:000376007200040  
637 <https://www.nature.com/articles/nature17164.pdf>.  
638 Loretz, C. A. (2008). Extracellular calcium-sensing receptors in fishes. *Comparative Biochemistry*  
639 *and Physiology Part A: Molecular & Integrative Physiology*, *149*(3), 225-245. Retrieved  
640 from <http://www.sciencedirect.com/science/article/pii/S1095643308000330>

641 <https://pdf.sciencedirectassets.com/271106/1-s2.0-S1095643308X00030/1-s2.0->  
642 [S1095643308000330/main.pdf?X-Amz-Security-](https://pdf.sciencedirectassets.com/271106/1-s2.0-S1095643308X00030/main.pdf?X-Amz-Security-)  
643 [Token=AgoJb3JpZ2luX2VjEWEwaCXVzLWVhc3QtMSJHMEUCIQCO4mUAda%2BnK3d4aN5YM](https://pdf.sciencedirectassets.com/271106/1-s2.0-S1095643308X00030/main.pdf?X-Amz-Security-Token=AgoJb3JpZ2luX2VjEWEwaCXVzLWVhc3QtMSJHMEUCIQCO4mUAda%2BnK3d4aN5YM)  
644 [uQbLP1W2RjUyYpm01YUBOP7SQIgalSjr36OB8YI3kjr%2BxKGqJ%2F4hHrOPlzTuy4E5TLmC](https://pdf.sciencedirectassets.com/271106/1-s2.0-S1095643308X00030/main.pdf?X-Amz-Security-Token=AgoJb3JpZ2luX2VjEWEwaCXVzLWVhc3QtMSJHMEUCIQCO4mUAda%2BnK3d4aN5YM)  
645 [Aq2gMIFRACGgwwNTkwMDM1NDY4NjUiDKF1knRZcrf1qV%2Fo1iq3AzbcVCbOW0phidF1](https://pdf.sciencedirectassets.com/271106/1-s2.0-S1095643308X00030/main.pdf?X-Amz-Security-Token=AgoJb3JpZ2luX2VjEWEwaCXVzLWVhc3QtMSJHMEUCIQCO4mUAda%2BnK3d4aN5YM)  
646 [opHlqcmHiYKdl%2Bnqd%2BpXAzKm7xfSxyPdnaspaMx85yZsLO2JhpNF6zEzb%2BGGWJekg](https://pdf.sciencedirectassets.com/271106/1-s2.0-S1095643308X00030/main.pdf?X-Amz-Security-Token=AgoJb3JpZ2luX2VjEWEwaCXVzLWVhc3QtMSJHMEUCIQCO4mUAda%2BnK3d4aN5YM)  
647 [%2Bn47eBmOMB%2FOHya%2BLLpyO6wOvyiUWndn3CP2%2BJfRfxDEDWG3HqAY5BjXTLU](https://pdf.sciencedirectassets.com/271106/1-s2.0-S1095643308X00030/main.pdf?X-Amz-Security-Token=AgoJb3JpZ2luX2VjEWEwaCXVzLWVhc3QtMSJHMEUCIQCO4mUAda%2BnK3d4aN5YM)  
648 [hWLISF7CUysGMysKijCdlploExtraRrB1bSf%2FsBLFM2%2FkoxPtF%2F89X82PUZEPYIXk%2FJa](https://pdf.sciencedirectassets.com/271106/1-s2.0-S1095643308X00030/main.pdf?X-Amz-Security-Token=AgoJb3JpZ2luX2VjEWEwaCXVzLWVhc3QtMSJHMEUCIQCO4mUAda%2BnK3d4aN5YM)  
649 [T7rsj9TGwF2eyMp6BliUzyXjy92bmHX%2FFHkmN5mnwMPKgh4DR%2FRJalMacY8kvh9zs](https://pdf.sciencedirectassets.com/271106/1-s2.0-S1095643308X00030/main.pdf?X-Amz-Security-Token=AgoJb3JpZ2luX2VjEWEwaCXVzLWVhc3QtMSJHMEUCIQCO4mUAda%2BnK3d4aN5YM)  
650 [NRqBcu%2Fd0UGrvS3lvSCcTgqBL8M7zZlasSw%2FgE6FAi0IYJ1IVCZ9eJKOVp9IXw2kp1a3q](https://pdf.sciencedirectassets.com/271106/1-s2.0-S1095643308X00030/main.pdf?X-Amz-Security-Token=AgoJb3JpZ2luX2VjEWEwaCXVzLWVhc3QtMSJHMEUCIQCO4mUAda%2BnK3d4aN5YM)  
651 [2u5%2FAfP4VA79%2Bis2fiqQSwJqDSNlgm3Z3z%2FxiOMSQAchIDNYpr3GXmXJdEI0MSfEZs](https://pdf.sciencedirectassets.com/271106/1-s2.0-S1095643308X00030/main.pdf?X-Amz-Security-Token=AgoJb3JpZ2luX2VjEWEwaCXVzLWVhc3QtMSJHMEUCIQCO4mUAda%2BnK3d4aN5YM)  
652 [fUyVD1ncbefMGgZW2gmL1x4J5fEctB2XsftBxUQ50rQa0xSdAOhkKb8heMXKIFwvGGjXp8L](https://pdf.sciencedirectassets.com/271106/1-s2.0-S1095643308X00030/main.pdf?X-Amz-Security-Token=AgoJb3JpZ2luX2VjEWEwaCXVzLWVhc3QtMSJHMEUCIQCO4mUAda%2BnK3d4aN5YM)  
653 [U3nGIWkSvWHm7mVNPCpuXT82%2FTLOdAEIDB5o9DgjX09%2FtNTakmoB8ccZtUjxaC%2F](https://pdf.sciencedirectassets.com/271106/1-s2.0-S1095643308X00030/main.pdf?X-Amz-Security-Token=AgoJb3JpZ2luX2VjEWEwaCXVzLWVhc3QtMSJHMEUCIQCO4mUAda%2BnK3d4aN5YM)  
654 [%2FriosHhx57m1t4IJ18sAbktWkaMTeryPffSjd3oSQI0wlfzt6wU6tAFbKpfg9xZVoq%2F7zCO](https://pdf.sciencedirectassets.com/271106/1-s2.0-S1095643308X00030/main.pdf?X-Amz-Security-Token=AgoJb3JpZ2luX2VjEWEwaCXVzLWVhc3QtMSJHMEUCIQCO4mUAda%2BnK3d4aN5YM)  
655 [XbQAY8M%2BpHcYEUiRqsQ0hvXzmi49zMgyb7bJhbf4payh7rWoot8ihe7FIkXwxmGBb5Hm](https://pdf.sciencedirectassets.com/271106/1-s2.0-S1095643308X00030/main.pdf?X-Amz-Security-Token=AgoJb3JpZ2luX2VjEWEwaCXVzLWVhc3QtMSJHMEUCIQCO4mUAda%2BnK3d4aN5YM)  
656 [REf8n0vAauwjq%2FKi5sIDF4iv07QmkCQBXYTiGOM6GYAEpP4CF9nXeB2xzaYaWGE3NrRc%](https://pdf.sciencedirectassets.com/271106/1-s2.0-S1095643308X00030/main.pdf?X-Amz-Security-Token=AgoJb3JpZ2luX2VjEWEwaCXVzLWVhc3QtMSJHMEUCIQCO4mUAda%2BnK3d4aN5YM)  
657 [2Foh%2Bg479oWshKFZr8Do3u2XH83yOmoZwCBlAHNYXRbpUX%2BadB0YimVGexBJXrhN](https://pdf.sciencedirectassets.com/271106/1-s2.0-S1095643308X00030/main.pdf?X-Amz-Security-Token=AgoJb3JpZ2luX2VjEWEwaCXVzLWVhc3QtMSJHMEUCIQCO4mUAda%2BnK3d4aN5YM)  
658 [rK55su6xPPY6h9ip7KMaiz6c%3D&X-Amz-Algorithm=AWS4-HMAC-SHA256&X-Amz-](https://pdf.sciencedirectassets.com/271106/1-s2.0-S1095643308X00030/main.pdf?X-Amz-Security-Token=AgoJb3JpZ2luX2VjEWEwaCXVzLWVhc3QtMSJHMEUCIQCO4mUAda%2BnK3d4aN5YM)  
659 [Date=20190913T123117Z&X-Amz-SignedHeaders=host&X-Amz-Expires=300&X-Amz-](https://pdf.sciencedirectassets.com/271106/1-s2.0-S1095643308X00030/main.pdf?X-Amz-Security-Token=AgoJb3JpZ2luX2VjEWEwaCXVzLWVhc3QtMSJHMEUCIQCO4mUAda%2BnK3d4aN5YM)  
660 [Credential=ASIAQ3PHCVTYTNTHVkw2%2F20190913%2Fus-east-](https://pdf.sciencedirectassets.com/271106/1-s2.0-S1095643308X00030/main.pdf?X-Amz-Security-Token=AgoJb3JpZ2luX2VjEWEwaCXVzLWVhc3QtMSJHMEUCIQCO4mUAda%2BnK3d4aN5YM)  
661 [1%2Fs3%2Faws4\\_request&X-Amz-](https://pdf.sciencedirectassets.com/271106/1-s2.0-S1095643308X00030/main.pdf?X-Amz-Security-Token=AgoJb3JpZ2luX2VjEWEwaCXVzLWVhc3QtMSJHMEUCIQCO4mUAda%2BnK3d4aN5YM)  
662 [Signature=fc91db636084d76428278ac5b61e474f1299ac46d229062478fa84cf3eeef52&](https://pdf.sciencedirectassets.com/271106/1-s2.0-S1095643308X00030/main.pdf?X-Amz-Security-Token=AgoJb3JpZ2luX2VjEWEwaCXVzLWVhc3QtMSJHMEUCIQCO4mUAda%2BnK3d4aN5YM)  
663 [hash=4d8b79bcde5fe92b02334d90e499b6b68f8a2b568ca01ed201e293329e171ef5&hos](https://pdf.sciencedirectassets.com/271106/1-s2.0-S1095643308X00030/main.pdf?X-Amz-Security-Token=AgoJb3JpZ2luX2VjEWEwaCXVzLWVhc3QtMSJHMEUCIQCO4mUAda%2BnK3d4aN5YM)  
664 [t=68042c943591013ac2b2430a89b270f6af2c76d8dfd086a07176afe7c76c2c61&pii=S109](https://pdf.sciencedirectassets.com/271106/1-s2.0-S1095643308X00030/main.pdf?X-Amz-Security-Token=AgoJb3JpZ2luX2VjEWEwaCXVzLWVhc3QtMSJHMEUCIQCO4mUAda%2BnK3d4aN5YM)  
665 [5643308000330&tid=spdf-fd3aa3f7-3098-4e0a-b1e2-](https://pdf.sciencedirectassets.com/271106/1-s2.0-S1095643308X00030/main.pdf?X-Amz-Security-Token=AgoJb3JpZ2luX2VjEWEwaCXVzLWVhc3QtMSJHMEUCIQCO4mUAda%2BnK3d4aN5YM)  
666 [4f1b3c38062d&sid=a86add896207d9411d8906c815da64411e33gxrbq&type=client.](https://pdf.sciencedirectassets.com/271106/1-s2.0-S1095643308X00030/main.pdf?X-Amz-Security-Token=AgoJb3JpZ2luX2VjEWEwaCXVzLWVhc3QtMSJHMEUCIQCO4mUAda%2BnK3d4aN5YM)  
667 doi:<https://doi.org/10.1016/j.cbpa.2008.01.037>  
668 Loretz, C. A., Pollina, C., Hyodo, S., & Takei, Y. (2009). Extracellular calcium-sensing receptor  
669 distribution in osmoregulatory and endocrine tissues of the tilapia. *General and*  
670 *Comparative Endocrinology*, 161(2), 216-228. Retrieved from  
671 <http://www.sciencedirect.com/science/article/pii/S0016648009000069>.  
672 doi:<https://doi.org/10.1016/j.ygcen.2008.12.020>  
673 Lorgen, M., Casadei, E., Król, E., Douglas, A., Birnie, M. J., Ebbesson, L. O., . . . Dardente, H. (2015).  
674 Functional Divergence of Type 2 Deiodinase Paralogs in the Atlantic Salmon. *Current*  
675 *Biology*, 25(7), 936-941. Retrieved from [https://pdf.sciencedirectassets.com/272099/1-](https://pdf.sciencedirectassets.com/272099/1-s2.0-S0960982214X0031X/1-s2.0-S0960982215001499/main.pdf?X-Amz-Security-)  
676 [s2.0-S0960982214X0031X/1-s2.0-S0960982215001499/main.pdf?X-Amz-Security-](https://pdf.sciencedirectassets.com/272099/1-s2.0-S0960982214X0031X/1-s2.0-S0960982215001499/main.pdf?X-Amz-Security-)  
677 [Token=AgoJb3JpZ2luX2VjEHWaCXVzLWVhc3QtMSJGMEQCIGJBmfliDxaTXUWfhLVTRtiad2d](https://pdf.sciencedirectassets.com/272099/1-s2.0-S0960982214X0031X/1-s2.0-S0960982215001499/main.pdf?X-Amz-Security-)  
678 [VFnsjQJkrxQrTpOiAiBwoHtaLoJ%2BmljMojcUFKeKMbx8vGb6oCAVDiN%2BX4rnSCraAwgV](https://pdf.sciencedirectassets.com/272099/1-s2.0-S0960982214X0031X/1-s2.0-S0960982215001499/main.pdf?X-Amz-Security-)  
679 [EAlaDDA1OTAwMzUONjg2NSIMjSmj1Wik%2B%2BtuctANKrcDOsGRQ7wsWKQeDv3mEmG](https://pdf.sciencedirectassets.com/272099/1-s2.0-S0960982214X0031X/1-s2.0-S0960982215001499/main.pdf?X-Amz-Security-)  
680 [gznduFi76bDTdZ%2Bo9p4SIPsk%2B39GeTBkXeeFvXlKfZm8i1DjWxbsvJdELAZm%2BXRWAc](https://pdf.sciencedirectassets.com/272099/1-s2.0-S0960982214X0031X/1-s2.0-S0960982215001499/main.pdf?X-Amz-Security-)  
681 [13HMuiOIMT2P2Kw8GXf2Yx8GNi4mr6vnG%2FRc5arH3%2FR%2Bk7e0T%2F2FNBUORMRO](https://pdf.sciencedirectassets.com/272099/1-s2.0-S0960982214X0031X/1-s2.0-S0960982215001499/main.pdf?X-Amz-Security-)  
682 [tborLcBAPXlw%2FnXxfmLf6nWA0aYuumdK%2Byo8I9WKD1s009%2FudN1Y36fkInOKSslg](https://pdf.sciencedirectassets.com/272099/1-s2.0-S0960982214X0031X/1-s2.0-S0960982215001499/main.pdf?X-Amz-Security-)  
683 [WJQC1lzoX2Q95rA5G%2B%2Bk1%2FkS577HphYRFIK9hRI2I9IT6%2Fq38yFcL6z9780FDWzY](https://pdf.sciencedirectassets.com/272099/1-s2.0-S0960982214X0031X/1-s2.0-S0960982215001499/main.pdf?X-Amz-Security-)  
684 [uzbWELglisR%2BR76nKJyFJbRrInTb%2BQu0tc2T2okhEMM3LCEYaGNsXOMENxe7Mew7bh](https://pdf.sciencedirectassets.com/272099/1-s2.0-S0960982214X0031X/1-s2.0-S0960982215001499/main.pdf?X-Amz-Security-)

685 [x%2BzM7i56MsmQDj%2B3blRZejBvPj0XdL%2B7eNs6uh8XF0ksQUj%2BWw1Y5pfeA37UG](https://doi.org/10.1101/2020.03.24.006510)  
686 [dUT%2B4JOWesqhFHTWjSxzmE9gt1gFNGnvebjevYDPcsMV9qZSBUjTBJe2XmJyhr45KZVv7V](https://doi.org/10.1101/2020.03.24.006510)  
687 [7URIPA%2FiaKGD%2Bgzw1MUsPnY75YOF69SoCGVtdIHUzT9zK7hfosU7dJUX4ixaRGBzn8N](https://doi.org/10.1101/2020.03.24.006510)  
688 [o1AyJAABtUFD8CTKZ%2Bml1qeWtFGYRT8VOwtPZEP5Wv3CDCC5s%2FqBTq1AU1CutnM](https://doi.org/10.1101/2020.03.24.006510)  
689 [W3RaGz4yiovMasRI6%2Fb0WBRKal4Cevbt1a5niWmlHgZNCymg4hKqwbw%2BgG1Ww7yn](https://doi.org/10.1101/2020.03.24.006510)  
690 [SdArr53ffn7Z2e4DIBl4A4v3%2FHGRrW7gl83M7HUzB%2FFgQJEI3GsVW%2F%2FHyxrf5pj7](https://doi.org/10.1101/2020.03.24.006510)  
691 [Upv5l8sUXCyoRrvB54PG2u8RZenK9S1fyQEP7les7Wdr2SpXHkZIZBWV1NDauhCvlCOtjgTU1](https://doi.org/10.1101/2020.03.24.006510)  
692 [vhfZhnv7vLT%2BahYbal1YX76Wq%2FnDg1s%2FS4%3D&X-Amz-Algorithm=AWS4-HMAC-](https://doi.org/10.1101/2020.03.24.006510)  
693 [SHA256&X-Amz-Date=20190814T124116Z&X-Amz-SignedHeaders=host&X-Amz-](https://doi.org/10.1101/2020.03.24.006510)  
694 [Expires=300&X-Amz-Credential=ASIAQ3PHCVTY773OG224%2F20190814%2Fus-east-](https://doi.org/10.1101/2020.03.24.006510)  
695 [1%2Fs3%2Faws4\\_request&X-Amz-](https://doi.org/10.1101/2020.03.24.006510)  
696 [Signature=68b68bd496211d1237ecf8b66e7f4cc530afeb96089e31e54c60d76817f7fef5&](https://doi.org/10.1101/2020.03.24.006510)  
697 [hash=cf473ca75175f408b2cc0516d14ab361f8cf740a87ebe8483437bb8b97f00df8&host=](https://doi.org/10.1101/2020.03.24.006510)  
698 [68042c943591013ac2b2430a89b270f6af2c76d8dfd086a07176afe7c76c2c61&pii=S09609](https://doi.org/10.1101/2020.03.24.006510)  
699 [82215001499&tid=spdf-23e1ca33-1de4-41ce-ab2f-](https://doi.org/10.1101/2020.03.24.006510)  
700 [3bf0dd6e44ef&sid=06316aaa90f2604e104b246-0ada382b372dgxrqb&type=client.](https://doi.org/10.1101/2020.03.24.006510)  
701 Lorgen, M., Jorgensen, E. H., Jordan, W. C., Martin, S. A. M., & Hazlerigg, D. G. (2017). NFAT5  
702 genes are part of the osmotic regulatory system in Atlantic salmon (*Salmo salar*). *Marine*  
703 *Genomics*, 31, 25-31. Retrieved from  
704 <http://www.sciencedirect.com/science/article/pii/S1874778716300587>  
705 <https://www.sciencedirect.com/science/article/pii/S1874778716300587?via%3Dihub>  
706  [708  \[710  \\[712  \\\[714  \\\\[716  \\\\\[718  \\\\\\[720  \\\\\\\[722  \\\\\\\\[724  \\\\\\\\\[726\\\\\\\\\]\\\\\\\\\(https://pdf.sciencedirectassets.com/277235/1-s2.0-S1874778717X00020/1-s2.0-S1874778716300587/main.pdf?X-Amz-Security-</a><br/>725 <a href=\\\\\\\\\)\\\\\\\\]\\\\\\\\(https://pdf.sciencedirectassets.com/277235/1-s2.0-S1874778717X00020/1-s2.0-S1874778716300587/main.pdf?X-Amz-Security-</a><br/>723 <a href=\\\\\\\\)\\\\\\\]\\\\\\\(https://pdf.sciencedirectassets.com/277235/1-s2.0-S1874778717X00020/1-s2.0-S1874778716300587/main.pdf?X-Amz-Security-</a><br/>721 <a href=\\\\\\\)\\\\\\]\\\\\\(https://pdf.sciencedirectassets.com/277235/1-s2.0-S1874778717X00020/1-s2.0-S1874778716300587/main.pdf?X-Amz-Security-</a><br/>719 <a href=\\\\\\)\\\\\]\\\\\(https://pdf.sciencedirectassets.com/277235/1-s2.0-S1874778717X00020/1-s2.0-S1874778716300587/main.pdf?X-Amz-Security-</a><br/>717 <a href=\\\\\)\\\\]\\\\(https://pdf.sciencedirectassets.com/277235/1-s2.0-S1874778717X00020/1-s2.0-S1874778716300587/main.pdf?X-Amz-Security-</a><br/>715 <a href=\\\\)\\\]\\\(https://pdf.sciencedirectassets.com/277235/1-s2.0-S1874778717X00020/1-s2.0-S1874778716300587/main.pdf?X-Amz-Security-</a><br/>713 <a href=\\\)\\]\\(https://pdf.sciencedirectassets.com/277235/1-s2.0-S1874778717X00020/1-s2.0-S1874778716300587/main.pdf?X-Amz-Security-</a><br/>711 <a href=\\)\]\(https://pdf.sciencedirectassets.com/277235/1-s2.0-S1874778717X00020/1-s2.0-S1874778716300587/main.pdf?X-Amz-Security-</a><br/>709 <a href=\)](https://pdf.sciencedirectassets.com/277235/1-s2.0-S1874778717X00020/1-s2.0-S1874778716300587/main.pdf?X-Amz-Security-</a><br/>707 <a href=)

- 728 [hash=39e27ceb338fd73eba3be5aeb75063dd76b10df0f9a55a55fefcc91102e6e09b&host](https://doi.org/10.1016/j.margen.2016.06.004)  
729 [=68042c943591013ac2b2430a89b270f6af2c76d8dfd086a07176afe7c76c2c61&pii=S1874](https://doi.org/10.1016/j.margen.2016.06.004)  
730 [778716300587&tid=spdf-762b6685-98cb-44d0-acf3-](https://doi.org/10.1016/j.margen.2016.06.004)  
731 [6f6e8b39cc7f&sid=10365d5498549547a839352-86428f5c1947gxrqa&type=client.](https://doi.org/10.1016/j.margen.2016.06.004)  
732 doi:<https://doi.org/10.1016/j.margen.2016.06.004>  
733 Love, M. I., Huber, W., & Anders, S. (2014). Moderated estimation of fold change and dispersion  
734 for RNA-seq data with DESeq2. *Genome Biology*, 15(12), 550-550. Retrieved from  
735 <https://www.ncbi.nlm.nih.gov/pubmed/25516281>  
736 <https://www.ncbi.nlm.nih.gov/pmc/PMC4302049/>. doi:10.1186/s13059-014-0550-8  
737 Lubin, R. T., Rourke, A. W., & Bradley, T. M. (1989). Ultrastructural alterations in branchial  
738 chloride cells of Atlantic salmon, *Salmo salar*, during parr-smolt transformation and early  
739 development in sea water. *J. Fish Biol.*, 34(2), 259-272. Retrieved from  
740 <https://onlinelibrary.wiley.com/doi/abs/10.1111/j.1095-8649.1989.tb03307.x>.  
741 doi:doi:10.1111/j.1095-8649.1989.tb03307.x  
742 Macian, F. (2005). NFAT proteins: key regulators of T-cell development and function. *Nature*  
743 *Reviews Immunology*, 5(6), 472-484. Retrieved from <https://doi.org/10.1038/nri1632>  
744 <https://www.nature.com/articles/nri1632.pdf>. doi:10.1038/nri1632  
745 Madsen, S. S., Kiilerich, P., & Tipsmark, C. K. (2009). Multiplicity of expression of Na<sup>+</sup>, K<sup>+</sup> -ATPase $\alpha$   
746 -subunit isoforms in the gill of Atlantic salmon (*Salmo salar*): cellular localisation and  
747 absolute quantification in response to salinity change. *J. Exp. Biol.*, 212(1), 78-88.  
748 Retrieved from <http://jeb.biologists.org/content/jexbio/212/1/78.full.pdf>.  
749 doi:10.1242/jeb.024612  
750 Martin, M. (2011). Cutadapt removes adapter sequences from high-throughput sequencing  
751 reads. *EMBnet.journal*, 17(1), 3. Retrieved from  
752 <http://journal.embnet.org/index.php/embnetjournal/article/view/200>.  
753 doi:10.14806/ej.17.1.200  
754 McCormick, S. D. (1994). Ontogeny and evolution of salinity tolerance in anadromous salmonids:  
755 Hormones and heterochrony. *Estuaries*, 17(1), 26. Retrieved from  
756 <https://doi.org/10.2307/1352332>  
757 <https://link.springer.com/content/pdf/10.2307%2F1352332.pdf>. doi:10.2307/1352332  
758 McCormick, S. D. (2001). Endocrine Control of Osmoregulation in Teleost Fish. *Am. Zool.*, 41(4),  
759 781-794. Retrieved from [http://dx.doi.org/10.1668/0003-](http://dx.doi.org/10.1668/0003-1569(2001)041[0781:ECOOIT]2.0.CO;2)  
760 [1569\(2001\)041\[0781:ECOOIT\]2.0.CO;2](http://dx.doi.org/10.1668/0003-1569(2001)041[0781:ECOOIT]2.0.CO;2)  
761 [http://www.bioone.org/doi/pdf/10.1668/0003-](http://www.bioone.org/doi/pdf/10.1668/0003-1569(2001)041[0781:ECOOIT]2.0.CO;2)  
762 [1569%282001%29041%5B0781%3AECOOIT%5D2.0.CO%3B2](http://www.bioone.org/doi/pdf/10.1668/0003-1569(2001)041[0781:ECOOIT]2.0.CO;2). doi:10.1668/0003-  
763 [1569\(2001\)041\[0781:ECOOIT\]2.0.CO;2](http://www.bioone.org/doi/pdf/10.1668/0003-1569(2001)041[0781:ECOOIT]2.0.CO;2)  
764 McCormick, S. D., Björnsson, B. T., Sheridan, M., Eilerlson, C., Carey, J. B., & O'Dea, M. (1995).  
765 Increased daylength stimulates plasma growth hormone and gill Na<sup>+</sup>, K<sup>+</sup>-ATPase in  
766 Atlantic salmon (*Salmo salar*). *Journal of Comparative Physiology B*, 165(4), 245-254.  
767 Retrieved from <https://doi.org/10.1007/BF00367308>  
768 <https://link.springer.com/content/pdf/10.1007%2FBF00367308.pdf>. doi:10.1007/bf00367308



- 769 McCormick, S. D., Hansen, L. P., Quinn, T. P., & Saunders, R. L. (1998). Movement, migration, and  
770 smolting of Atlantic salmon (*Salmo salar*). *Can. J. Fish. Aquat. Sci.*, 55(S1), 77-92. Retrieved  
771 from <http://www.nrcresearchpress.com/doi/abs/10.1139/d98-011>. doi:10.1139/d98-011
- 772 McCormick, S. D., Regish, A. M., Christensen, A. K., & Björnsson, B. T. (2013). Differential  
773 regulation of sodium–potassium pump isoforms during smolt development and seawater  
774 exposure of Atlantic salmon. *J. Exp. Biol.*, 216(7), 1142-1151. Retrieved from  
775 <http://jeb.biologists.org/content/jexbio/216/7/1142.full.pdf>. doi:10.1242/jeb.080440
- 776 McCormick, S. D., Shrimpton, J. M., Moriyama, S., & Björnsson, B. T. (2007). Differential hormonal  
777 responses of Atlantic salmon parr and smolt to increased daylength: A possible  
778 developmental basis for smolting. *Aquaculture*, 273(2), 337-344. Retrieved from  
779 <http://www.sciencedirect.com/science/article/pii/S0044848607009490>  
780 <https://ac.els-cdn.com/S0044848607009490/1-s2.0-S0044848607009490->  
781 [main.pdf?tid=b4f23183-7e0a-4a5b-b10a-](https://ac.els-cdn.com/S0044848607009490/1-s2.0-S0044848607009490-main.pdf?tid=b4f23183-7e0a-4a5b-b10a-e2b2d0426cdc&acdnat=1537782400_e4cf25464cec1dae9188d8cb59831b98)  
782 [e2b2d0426cdc&acdnat=1537782400\\_e4cf25464cec1dae9188d8cb59831b98](https://ac.els-cdn.com/S0044848607009490/1-s2.0-S0044848607009490-main.pdf?tid=b4f23183-7e0a-4a5b-b10a-e2b2d0426cdc&acdnat=1537782400_e4cf25464cec1dae9188d8cb59831b98).  
783 doi:10.1016/j.aquaculture.2007.10.015
- 784 Metcalfe, N. B., Huntingford, F. A., & Thorpe, J. E. (1988). Feeding Intensity, Growth Rates, and  
785 the Establishment of Life-History Patterns in Juvenile Atlantic Salmon *Salmo salar*. *Journal*  
786 *of Animal Ecology*, 57(2), 463-474. Retrieved from <http://www.jstor.org/stable/4918>.  
787 doi:10.2307/4918
- 788 Mulugeta, T. D., Nome, T., To, T.-H., Gundappa, M. K., Macqueen, D. J., Våge, D. I., . . . Hvidsten,  
789 T. R. (2019). SalMotifDB: a tool for analyzing putative transcription factor binding sites in  
790 salmonid genomes. *BMC Genomics*, 20(1), 694. Retrieved from  
791 <https://doi.org/10.1186/s12864-019-6051-0>. doi:10.1186/s12864-019-6051-0
- 792 Nearing, J., Betka, M., Quinn, S., Hentschel, H., Elger, M., Baum, M., . . . Hebert, S. (2002).  
793 Polyvalent cation receptor proteins (CaRs) are salinity sensors in fish. *Proceedings of the*  
794 *National Academy of Sciences*, 99(14), 9231-9236. Retrieved from  
795 <https://www.ncbi.nlm.nih.gov/pmc/articles/PMC123123/pdf/pq1402009231.pdf>.
- 796 Nilsen, T. O., Ebbesson, L. O. E., Madsen, S. S., McCormick, S. D., Andersson, E., Björnsson, B. T., . . .  
797 Stefansson, S. O. (2007). Differential expression of gill Na<sup>+</sup>,K<sup>+</sup>-ATPase  $\alpha$ - and  $\beta$ -subunits,  
798 Na<sup>+</sup>,K<sup>+</sup>,2Cl<sup>-</sup> cotransporter and CFTR anion channel in juvenile anadromous and landlocked  
799 Atlantic salmon *Salmo salar*. *J. Exp. Biol.*, 210(16), 2885-2896. Retrieved from  
800 <http://jeb.biologists.org/content/jexbio/210/16/2885.full.pdf>. doi:10.1242/jeb.002873
- 801 Pisam, M., Prunet, P., Boeuf, G., & Jrambourg, A. (1988). Ultrastructural features of chloride cells  
802 in the gill epithelium of the Atlantic salmon, *Salmo salar*, and their modifications during  
803 smoltification. *Am. J. Anat.*, 183(3), 235-244. Retrieved from  
804 <https://onlinelibrary.wiley.com/doi/abs/10.1002/aja.1001830306>.  
805 doi:10.1002/aja.1001830306
- 806 Prunet, P., & Boeuf, G. (1985). Plasma prolactin level during transfer of rainbow trout (*Salmo*  
807 *gairdneri*) and Atlantic salmon (*Salmo salar*) from fresh water to sea water. *Aquaculture*,  
808 45(1), 167-176. Retrieved from  
809 <http://www.sciencedirect.com/science/article/pii/0044848685902674>.  
810 doi:[https://doi.org/10.1016/0044-8486\(85\)90267-4](https://doi.org/10.1016/0044-8486(85)90267-4)

- 811 Putney, James W. (2012). Calcium Signaling: Deciphering the Calcium–NFAT Pathway. *Current*  
812 *Biology*, 22(3), R87-R89. Retrieved from  
813 <http://www.sciencedirect.com/science/article/pii/S0960982211014436>.  
814 doi:<https://doi.org/10.1016/j.cub.2011.12.030>
- 815 Rao, A., Luo, C., & Hogan, P. G. (1997). TRANSCRIPTION FACTORS OF THE NFAT  
816 FAMILY: Regulation and Function. *Annual Review of Immunology*, 15(1), 707-747.  
817 Retrieved from  
818 <https://www.annualreviews.org/doi/abs/10.1146/annurev.immunol.15.1.707>  
819 <https://www.annualreviews.org/doi/pdf/10.1146/annurev.immunol.15.1.707>.  
820 doi:10.1146/annurev.immunol.15.1.707
- 821 Samy, J. K. A., Mulugeta, T. D., Nome, T., Sandve, S. R., Grammes, F., Kent, M. P., . . . Vage, D. I.  
822 (2017). SalmoBase: an integrated molecular data resource for Salmonid species. *BMC*  
823 *Genomics*, 18(1), 482. Retrieved from <https://www.ncbi.nlm.nih.gov/pubmed/28651544>.  
824 doi:10.1186/s12864-017-3877-1
- 825 Saunders, R. L., Henderson, E. B., & Harmon, P. R. (1985). Effects of photoperiod on juvenile  
826 growth and smolting of Atlantic salmon and subsequent survival and growth in sea cages.  
827 *Aquaculture*, 45(1), 55-66. Retrieved from  
828 <http://www.sciencedirect.com/science/article/pii/0044848685902571>.  
829 doi:[https://doi.org/10.1016/0044-8486\(85\)90257-1](https://doi.org/10.1016/0044-8486(85)90257-1)
- 830 Skilbrei, O. T. (1991). Importance of Threshold Length and Photoperiod for the Development of  
831 Bimodal Length–Frequency Distribution in Atlantic Salmon (*Salmo salar*). *Canadian Journal*  
832 *of Fisheries and Aquatic Sciences*, 48(11), 2163-2172. Retrieved from  
833 <https://doi.org/10.1139/f91-255>  
834 <https://www.nrcresearchpress.com/doi/10.1139/f91-255>. doi:10.1139/f91-255
- 835 Stagg, R. M., Talbot, C., Eddy, F. B., & Williams, M. (1989). Seasonal variations in osmoregulatory  
836 and respiratory responses to seawater exposure of juvenile Atlantic salmon (*Salmo salar*)  
837 maintained in freshwater. *Aquaculture*, 82(1), 219-228. Retrieved from  
838 <http://www.sciencedirect.com/science/article/pii/0044848689904109>  
839 [https://pdf.sciencedirectassets.com/271224/1-s2.0-S0044848600X03547/1-s2.0-0044848689904109/main.pdf?X-Amz-Security-](https://pdf.sciencedirectassets.com/271224/1-s2.0-S0044848600X03547/1-s2.0-0044848689904109/main.pdf?X-Amz-Security-Token=AgoJb3JpZ2luX2VjEHsaCXVzLWVhc3QtMSJIMEYCIQCU6n9RpBcH7M7HpV1C3qkXo)  
840 [Token=AgoJb3JpZ2luX2VjEHsaCXVzLWVhc3QtMSJIMEYCIQCU6n9RpBcH7M7HpV1C3qkXo](https://pdf.sciencedirectassets.com/271224/1-s2.0-S0044848600X03547/1-s2.0-0044848689904109/main.pdf?X-Amz-Security-Token=AgoJb3JpZ2luX2VjEHsaCXVzLWVhc3QtMSJIMEYCIQCU6n9RpBcH7M7HpV1C3qkXo)  
841 [hLdJsuuVo38BacZ78rFnQlhAJM6X%2BXSIBh2TmbLS6Gx5CObzbYPUox%2Fz%2BPu9fXfwiY](https://pdf.sciencedirectassets.com/271224/1-s2.0-S0044848600X03547/1-s2.0-0044848689904109/main.pdf?X-Amz-Security-Token=AgoJb3JpZ2luX2VjEHsaCXVzLWVhc3QtMSJIMEYCIQCU6n9RpBcH7M7HpV1C3qkXo)  
842 [KtoDCBQQAhoMMDU5MDAazNTQ2ODY1lgxitfATOxvSquX3E90qtWpqrYhR40fY6Rr6xRszA%](https://pdf.sciencedirectassets.com/271224/1-s2.0-S0044848600X03547/1-s2.0-0044848689904109/main.pdf?X-Amz-Security-Token=AgoJb3JpZ2luX2VjEHsaCXVzLWVhc3QtMSJIMEYCIQCU6n9RpBcH7M7HpV1C3qkXo)  
843 [2FaTU2c%2BgjJsUfv3p46nvwSQezVpqDGYGWPeiEfliBBZbpltrTAA2dKYQnUhxV87XeHje1b7](https://pdf.sciencedirectassets.com/271224/1-s2.0-S0044848600X03547/1-s2.0-0044848689904109/main.pdf?X-Amz-Security-Token=AgoJb3JpZ2luX2VjEHsaCXVzLWVhc3QtMSJIMEYCIQCU6n9RpBcH7M7HpV1C3qkXo)  
844 [YjSIBJO53gTvFi4vL3k%2F7QxZd%2BlpplBnaggWMv780%2Fk4MJLxQ0zv3rYAZ3K7x2LzjsDy](https://pdf.sciencedirectassets.com/271224/1-s2.0-S0044848600X03547/1-s2.0-0044848689904109/main.pdf?X-Amz-Security-Token=AgoJb3JpZ2luX2VjEHsaCXVzLWVhc3QtMSJIMEYCIQCU6n9RpBcH7M7HpV1C3qkXo)  
845 [DBp7bVJXuwS4YPvDyM%2B6j%2BXHf382MrvXcGKJTIDnDsyNVPnlbHvKDD2zXmomB5agI9](https://pdf.sciencedirectassets.com/271224/1-s2.0-S0044848600X03547/1-s2.0-0044848689904109/main.pdf?X-Amz-Security-Token=AgoJb3JpZ2luX2VjEHsaCXVzLWVhc3QtMSJIMEYCIQCU6n9RpBcH7M7HpV1C3qkXo)  
846 [xcb9S8BLM4skHaWBPOgbqzDBQgD%2FtxgakiFDXcGgXSEASd%2BojxtYvHUdtP9ZFLTlxABf](https://pdf.sciencedirectassets.com/271224/1-s2.0-S0044848600X03547/1-s2.0-0044848689904109/main.pdf?X-Amz-Security-Token=AgoJb3JpZ2luX2VjEHsaCXVzLWVhc3QtMSJIMEYCIQCU6n9RpBcH7M7HpV1C3qkXo)  
847 [2ZX469iTfawnLMO1wFckm3%2Fe9IT2WvXsUyqFVW5k7gCviUG2lze67qvifna4fhv5NUufhP](https://pdf.sciencedirectassets.com/271224/1-s2.0-S0044848600X03547/1-s2.0-0044848689904109/main.pdf?X-Amz-Security-Token=AgoJb3JpZ2luX2VjEHsaCXVzLWVhc3QtMSJIMEYCIQCU6n9RpBcH7M7HpV1C3qkXo)  
848 [lgEUUZTgQT5NwttgZTexMrMhm9FzEH28k%2BxFXEnxMIRqmcRVUcH4qv0oIKFexwHLS7%](https://pdf.sciencedirectassets.com/271224/1-s2.0-S0044848600X03547/1-s2.0-0044848689904109/main.pdf?X-Amz-Security-Token=AgoJb3JpZ2luX2VjEHsaCXVzLWVhc3QtMSJIMEYCIQCU6n9RpBcH7M7HpV1C3qkXo)  
849 [2FSJUr4hKun0HdncMumhJz2X%2Fqb9NgTHOYtlyBu7W%2BK%2F0cKGrbKHC%2B%2FZC8x](https://pdf.sciencedirectassets.com/271224/1-s2.0-S0044848600X03547/1-s2.0-0044848689904109/main.pdf?X-Amz-Security-Token=AgoJb3JpZ2luX2VjEHsaCXVzLWVhc3QtMSJIMEYCIQCU6n9RpBcH7M7HpV1C3qkXo)  
850 [xgMxUA48N2G%2BeKEbCNqG9vQG%2Bft%2BZ6RWRkUfuZeEpBHIDTrIM9ynallKdN4k9gm](https://pdf.sciencedirectassets.com/271224/1-s2.0-S0044848600X03547/1-s2.0-0044848689904109/main.pdf?X-Amz-Security-Token=AgoJb3JpZ2luX2VjEHsaCXVzLWVhc3QtMSJIMEYCIQCU6n9RpBcH7M7HpV1C3qkXo)  
851 [xt6JlkcXTtZxnwNtY99ZXvuiAx9CrHQkrNZMKvJz%2BoFORMBuwNLOqRzI9qk%2FJczU42qr7](https://pdf.sciencedirectassets.com/271224/1-s2.0-S0044848600X03547/1-s2.0-0044848689904109/main.pdf?X-Amz-Security-Token=AgoJb3JpZ2luX2VjEHsaCXVzLWVhc3QtMSJIMEYCIQCU6n9RpBcH7M7HpV1C3qkXo)  
852

853 [g6n8PFspxQ6C47VUZyecLWfbYh8RHym2SFTVRtII8xhijUL7on3yTvGNyU2ttnH%2FeMQSy1](https://doi.org/10.1016/0044-8486(89)90410-9)  
854 [WsBWuJ%2FxfjWi4UyGI%2Fy1lcWwyfmJRwVcOqe4afSdl3jahMY7SIXerJSmoxyvgZfApgfjfeC](https://doi.org/10.1016/0044-8486(89)90410-9)  
855 [xAKeVIQeHazL72eG9Y8Pkh2%2BQqS4MSbflGSgxTMDxWtjWJKCNcHDbMZGv7fFoLx27vJ1](https://doi.org/10.1016/0044-8486(89)90410-9)  
856 [CVHBPZOOg%3D&X-Amz-Algorithm=AWS4-HMAC-SHA256&X-Amz-](https://doi.org/10.1016/0044-8486(89)90410-9)  
857 [Date=20190814T105514Z&X-Amz-SignedHeaders=host&X-Amz-Expires=300&X-Amz-](https://doi.org/10.1016/0044-8486(89)90410-9)  
858 [Credential=ASIAQ3PHCVTYRIUWSHXC%2F20190814%2Fus-east-](https://doi.org/10.1016/0044-8486(89)90410-9)  
859 [1%2Fs3%2Faws4\\_request&X-Amz-](https://doi.org/10.1016/0044-8486(89)90410-9)  
860 [Signature=d5eb1ef45a47f2fa96c9a32de76332d61ba26202164a216a9d606e7f9bd2f797&](https://doi.org/10.1016/0044-8486(89)90410-9)  
861 [hash=6a20bfaab48eed5b00c4fed2fcf8712cf64429a9f7584a37d310d9bf79c4925f&host=6](https://doi.org/10.1016/0044-8486(89)90410-9)  
862 [8042c943591013ac2b2430a89b270f6af2c76d8dfd086a07176afe7c76c2c61&pii=0044848](https://doi.org/10.1016/0044-8486(89)90410-9)  
863 [689904109&tid=spdf-ca5a187c-f17d-4a16-b2af-](https://doi.org/10.1016/0044-8486(89)90410-9)  
864 [640bab6e1580&sid=7cdba84e57d0454026880bc6702956ebbec2gxrbq&type=client.](https://doi.org/10.1016/0044-8486(89)90410-9)  
865 [doi:\[https://doi.org/10.1016/0044-8486\\(89\\)90410-9\]\(https://doi.org/10.1016/0044-8486\(89\)90410-9\)](https://doi.org/10.1016/0044-8486(89)90410-9)  
866 Stefansson, S. O., Berge, Å. I., & Gunnarsson, G. S. (1998). Changes in seawater tolerance and gill  
867 Na<sup>+</sup>,K<sup>+</sup>-ATPase activity during desmoltification in Atlantic salmon kept in freshwater at  
868 different temperatures. *Aquaculture*, 168(1), 271-277. Retrieved from  
869 <http://www.sciencedirect.com/science/article/pii/S0044848698003548>  
870 [Signature=e2ca5c4cbee1cf740872a8fb2032e189b68399075e706edbc60ed44773c39730](https://pdf.sciencedirectassets.com/271224/1-s2.0-S0044848600X00750/1-s2.0-S0044848698003548/main.pdf?X-Amz-Security-Token=AgoJb3JpZ2luX2VjEHwaCXVzLWVhc3QtMSJHMEUCIQDDeqI0qXUif0Bd1KbV3RurWzTaVOz2GImtqiAEqJfibQlGU%2BSBDr66URYCfXtgdKBJZKxeGOF5C%2FFICSPISvhVPX8q2gMIFRACGgwwNTkwMDM1NDY4NjUiDD1TOWg%2FhjF5CBreTSq3A9DrKhIByzhnjwcpNRKd3nsOwnGKaU9No%2BzJjssqB5N5G6uvRylpkNKDBO7c8WfY191xbBRoq0fQ13HSBxDQ3YWJuoetx%2B2GGx1qe63wrhRvqgHqsUR8DFPZGdihmT4GNYPZl9uF%2FlrsEtBNRdqC2D8BNJErYaiJQ%2BB6dWamQlu5CKPm9aqjhzYPjVl0l1pYNqdNSpdG%2FhCE5%2BMg3lqYSZ2ouiMCVjFj6TPRC1PQVZO3aXAbR66dp%2BNCFUyQjbG4pXK896Dk1u6NP4bEYeSiO161vNDIHeQKTi5l20jOD8Eouv725T%2FjFWTVseNGosJGkqglcRjugVy3%2Fn10COH6Nzq2UooVDHca%2FehHH7mEQ0CjG5zArrj2rRHuGgWJgkD9HJ412OYZvpYiQf9zywJzU38QW2wtuPfwMqYMyQftSm%2Bi8vpy2vfN725e8lrf79mFfEAzYGOMILXc9oi%2FpjjDRewYbhGRs54kgXbWk28wwAYS364Vs2DQ9vbYzNSNCnjKOcb8F64TqYfGomduQgMIP4ed3D1P0eMOWYJ%2BYG%2B2GT05beysxDv6dMg27shqFpY4r6MIAEwu%2BXP6gU6tAE7QQC3YqTITxQ5uJ4Lk9DRfRWFHQBGv7gP%2BMQxZbPGbBII%2Fe4q2cQN8Y5dd32ujyf%2FIlly%2FcsDom3yjWdpLIH2JZefl74U7DoCSBD8zXvwxoRHSdEx%2BRyrB5k6rzejngoZ2FXr2hmhCPAfq%2FDN7%2BjVIYX2dL8KHiTaCpYXMDmOaQ1pJdH938jMgGOikryni2T5f2XPNO81zyOS%2FicjAdJf4LnO8NDUUhMH8z2Uy2yW9XzB6i%2Bc%3D&X-Amz-Algorithm=AWS4-HMAC-SHA256&X-Amz-Date=20190814T120225Z&X-Amz-SignedHeaders=host&X-Amz-Expires=300&X-Amz-Credential=ASIAQ3PHCVTYRDDZOPXF%2F20190814%2Fus-east-1%2Fs3%2Faws4_request&X-Amz-Signature=e2ca5c4cbee1cf740872a8fb2032e189b68399075e706edbc60ed44773c39730&hash=a26c5196056ba684c84f0657281c9f95da892f26f60560bb4185a8ecc23af1d8&host=68042c943591013ac2b2430a89b270f6af2c76d8dfd086a07176afe7c76c2c61&pii=S0044848698003548&tid=spdf-05564b46-b533-472d-8529-</a><br/>891 <a href=)  
892 [&hash=a26c5196056ba684c84f0657281c9f95da892f26f60560bb4185a8ecc23af1d8&hos](https://doi.org/10.1016/0044-8486(89)90410-9)  
893 [t=68042c943591013ac2b2430a89b270f6af2c76d8dfd086a07176afe7c76c2c61&pii=S004](https://doi.org/10.1016/0044-8486(89)90410-9)  
894 [4848698003548&tid=spdf-05564b46-b533-472d-8529-](https://doi.org/10.1016/0044-8486(89)90410-9)





938 <https://www.nrcresearchpress.com/doi/pdfplus/10.1139/f04-010>  
939 [mddvsB7eYEO3RpYkkKWtQDDm4HMeVcyU%3D&X-Amz-Algorithm=AWS4-HMAC-](https://www.nrcresearchpress.com/doi/pdfplus/10.1139/f04-010)  
940 [SHA256&X-Amz-Date=20190918T121546Z&X-Amz-SignedHeaders=host&X-Amz-](https://www.nrcresearchpress.com/doi/pdfplus/10.1139/f04-010)  
941 [Expires=300&X-Amz-Credential=ASIAQ3PHCVTYWLWRQ2ZZ%2F20190918%2Fus-east-](https://www.nrcresearchpress.com/doi/pdfplus/10.1139/f04-010)  
942 [1%2Fs3%2Faws4\\_request&X-Amz-](https://www.nrcresearchpress.com/doi/pdfplus/10.1139/f04-010)  
943 [Signature=94b01399cc6a1beb2a028d91fdb13f6f536a8139c5147695fbfcfb9c75903380&](https://www.nrcresearchpress.com/doi/pdfplus/10.1139/f04-010)  
944 [hash=cc27e03e7967ad28c35a0a6103b9be4ffcbdcfb2bcb921af9f3e477bc0eaa0c2&host=](https://www.nrcresearchpress.com/doi/pdfplus/10.1139/f04-010)  
945 [68042c943591013ac2b2430a89b270f6af2c76d8dfd086a07176afe7c76c2c61&pii=S00062](https://www.nrcresearchpress.com/doi/pdfplus/10.1139/f04-010)  
946 [91X06013118&tid=spdf-bdfb7e1b-76aa-43da-ba0f-](https://www.nrcresearchpress.com/doi/pdfplus/10.1139/f04-010)  
947 [472c2d75c869&sid=15a645e68b13884aa95976859ebf4af432d7gxrbq&type=client.](https://www.nrcresearchpress.com/doi/pdfplus/10.1139/f04-010)  
948 doi:<https://doi.org/10.1016/j.bbrc.2006.06.028>  
949 Walter, W., Sánchez-Cabo, F., & Ricote, M. (2015). GOplot: an R package for visually combining  
950 expression data with functional analysis. *Bioinformatics*, 31(17), 2912-2914. Retrieved  
951 from <https://doi.org/10.1093/bioinformatics/btv300>. doi:10.1093/bioinformatics/btv300  
952 Wilson, J. M., Antunes, J. C., Bouça, P. D., & Coimbra, J. (2004). Osmoregulatory plasticity of the  
953 glass eel of *Anguilla anguilla*: freshwater entry and changes in branchial ion-transport  
954 protein expression. *Canadian Journal of Fisheries and Aquatic Sciences*, 61(3), 432-442.  
955 Retrieved from <https://doi.org/10.1139/f04-010>  
956 <https://www.nrcresearchpress.com/doi/pdfplus/10.1139/f04-010>. doi:10.1139/f04-010  
957 Wilson, J. M., & Laurent, P. (2002). Fish gill morphology: inside out. *Journal of Experimental*  
958 *Zoology*, 293(3), 192-213. Retrieved from  
959 <https://onlinelibrary.wiley.com/doi/abs/10.1002/jez.10124>  
960 <https://onlinelibrary.wiley.com/doi/pdf/10.1002/jez.10124>. doi:10.1002/jez.10124  
961 Woo, S., Lee, S., & Kwon, M. H. (2002). TonEBP transcriptional activator in the cellular response  
962 to increased osmolality. *Pflügers Archiv*, 444(5), 579-585. Retrieved from  
963 <https://doi.org/10.1007/s00424-002-0849-2>  
964 <https://link.springer.com/content/pdf/10.1007%2Fs00424-002-0849-2.pdf>. doi:10.1007/s00424-  
965 002-0849-2  
966 Zhou, X., Ferraris, J. D., & Burg, M. B. (2006). Mitochondrial reactive oxygen species contribute to  
967 high NaCl-induced activation of the transcription factor TonEBP/OREBP. *American Journal*  
968 *of Physiology-Renal Physiology*, 290(5), F1169-F1176. Retrieved from  
969 <https://www.physiology.org/doi/abs/10.1152/ajprenal.00378.2005>  
970 <https://www.physiology.org/doi/pdf/10.1152/ajprenal.00378.2005>.  
971 doi:10.1152/ajprenal.00378.2005  
972  
973

974 **Figure legends**

975 **Figure 1 Experimental design and the changing effect of SW challenge on hypo-osmoregulatory**  
976 **capacity.** A) Experimental set-up showing the three photoperiod treatments. Samplings are indicated by  
977 black dots. B) Plasma osmolality following 24-h SW challenge, data are mean  $\pm$  S.E.M of n = 6  
978 observations; \*\*\* / \*\*\*\* = significantly higher osmolality than at T1,  $p < 0.001$  /  $0.0001$ , respectively.

979 **Figure 2 Effect of photoperiodic history on the gill transcriptomic response to SW-challenge.** A) PCA  
980 plot based on gene expression of the sampled fish. Blue indicates fish sampled from FW and red  
981 indicates fish sampled after a 24-h SW challenge. B) Venn diagram showing the number of DEGs ( $p < 0.01$ ,  
982  $\log_2\text{-FC} > |1|$ ) found for each treatment condition at day 110 (T6), and the degree of overlap between the  
983 treatments. C) 'Upset'-plots, indicating how the number of DEGs changed across the three latter  
984 timepoints of the experiment for each of the treatments. The bar graph shows number of unique or  
985 shared genes for the treatment group(s) indicated by the table below. D) GO-term analysis of SW-  
986 sensitive gene expression at T6 for the 3 photoperiod treatments; data are shown as Bubble-plots of  
987 enriched biological process (BP) GO-terms and the number of genes linked to each term. Terms enriched  
988 across groups are indicated by color. Strongly represented GO-terms are labeled. See supplemental  
989 figure S1 for other timepoints and GO categories, and supplemental table S2 for a table of GO-terms and  
990 names.

991 **Figure 3 Photoperiodic history-dependent responses of NFAT family members to SW-challenge.** The  
992 heatmap shows the expression of NFAT-genes (CPM) across the three latter timepoints of the SP-  
993 treatment, and graphs on the right show representative profiles of selected NFAT-genes in the 3  
994 photoperiod treatments.

995 **Figure 4 Photoperiodic history-dependent promoter motif enrichment for NFAT and glucocorticoid**  
996 **response elements in SW-induced transcript profiles.** Panels A and B show the enrichment of NFAT- and  
997 GRE-transcription motifs, respectively, in up- and down-regulated genes at T6, for the three different  
998 photoperiod-treatments.

999

1000 [Supplemental material](#)

1001 **S1** Overview of DEGs for each condition and timepoint, after filtering for  $FDR < 0.01$  and a  $\log_2$ -fold change  
1002 of  $|1|$ .

1003 **S2** Boxplots of the genes KCNJ1, KCNJ5 and JCAD, raw counts.

1004 **S3** Additional GO plots showing how GO-enrichment varies over time and between treatments.

1005 **S4, S5 and S6** Results from the GO analysis and overview of the GO-terms that are included in the plots  
1006 after filtering for number of connected genes and log of the adjusted p-value for enrichment.

1007 **S7** Overview of NFAT-genes, including raw count data. Genes are ordered as in the heatmap.

1008 **S8** Boxplots of the NFAT genes, raw counts.

A)

- Continuous light, 24:0
- Short photoperiod, 8:16

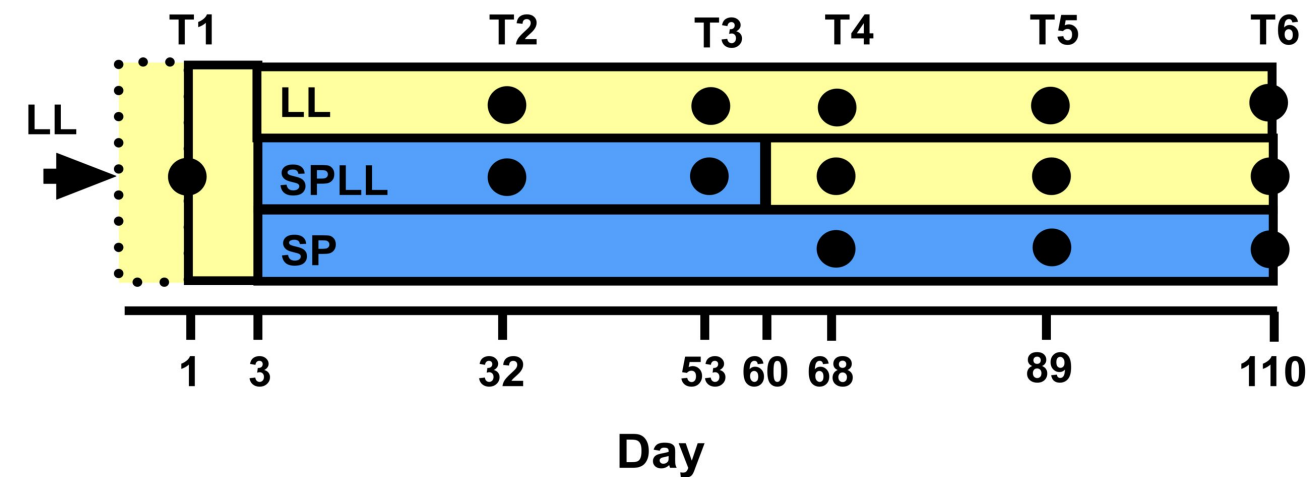

B)

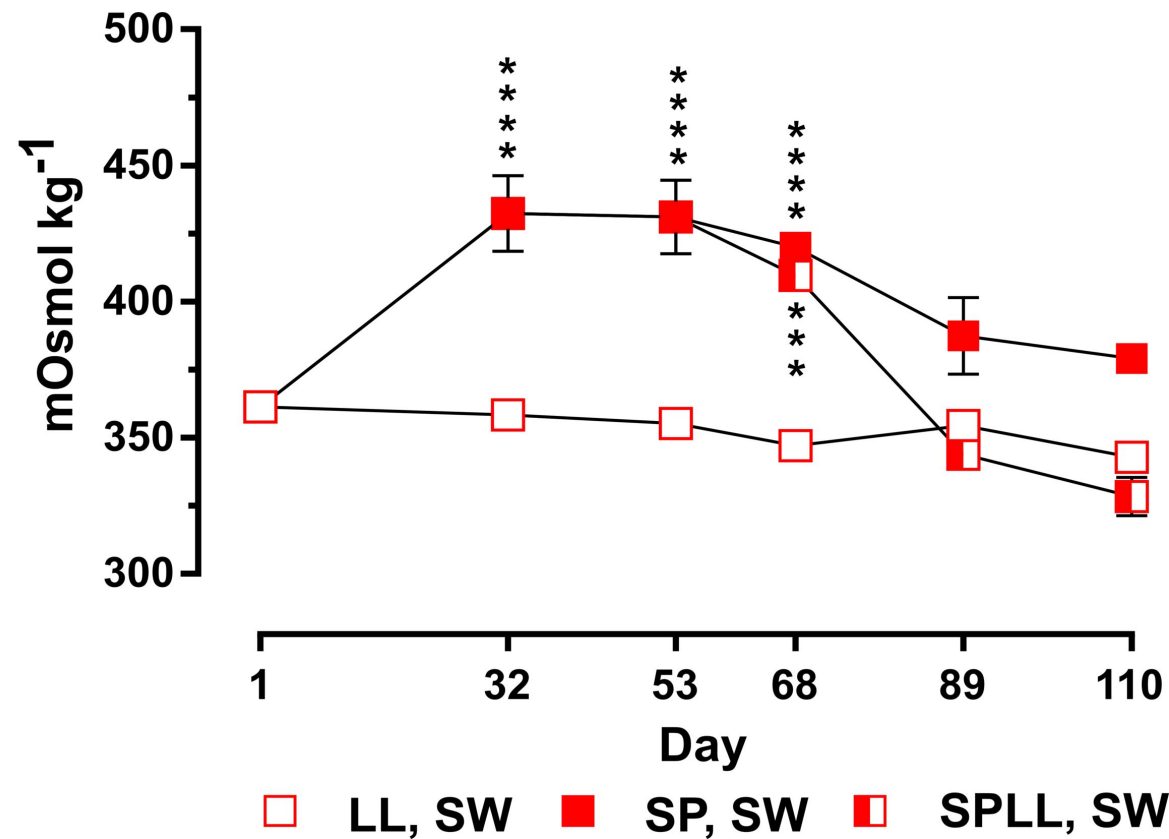

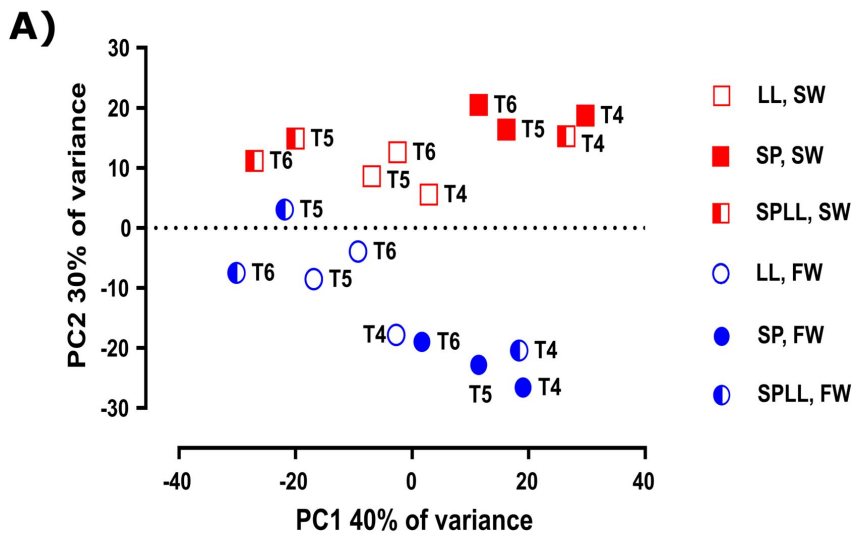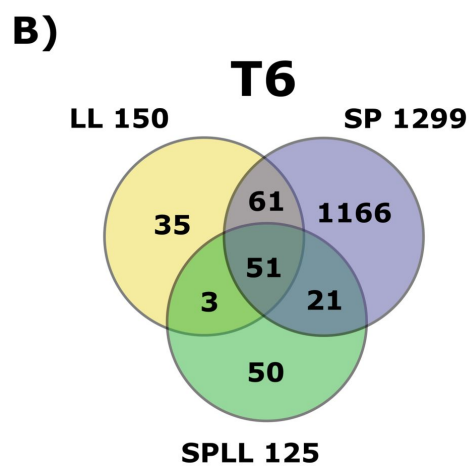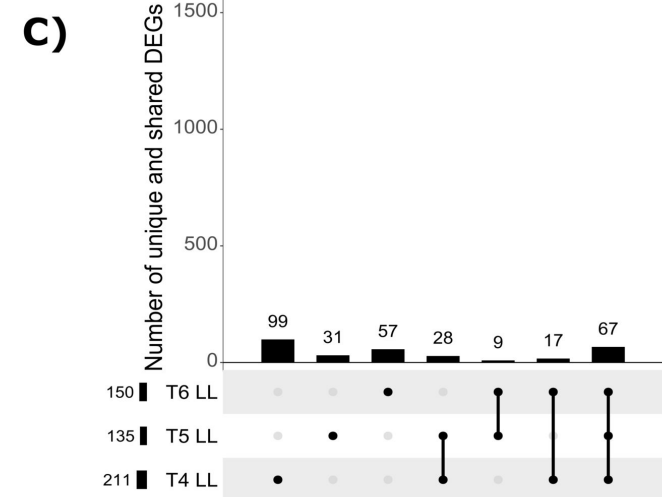

**D) T6 Biological product**

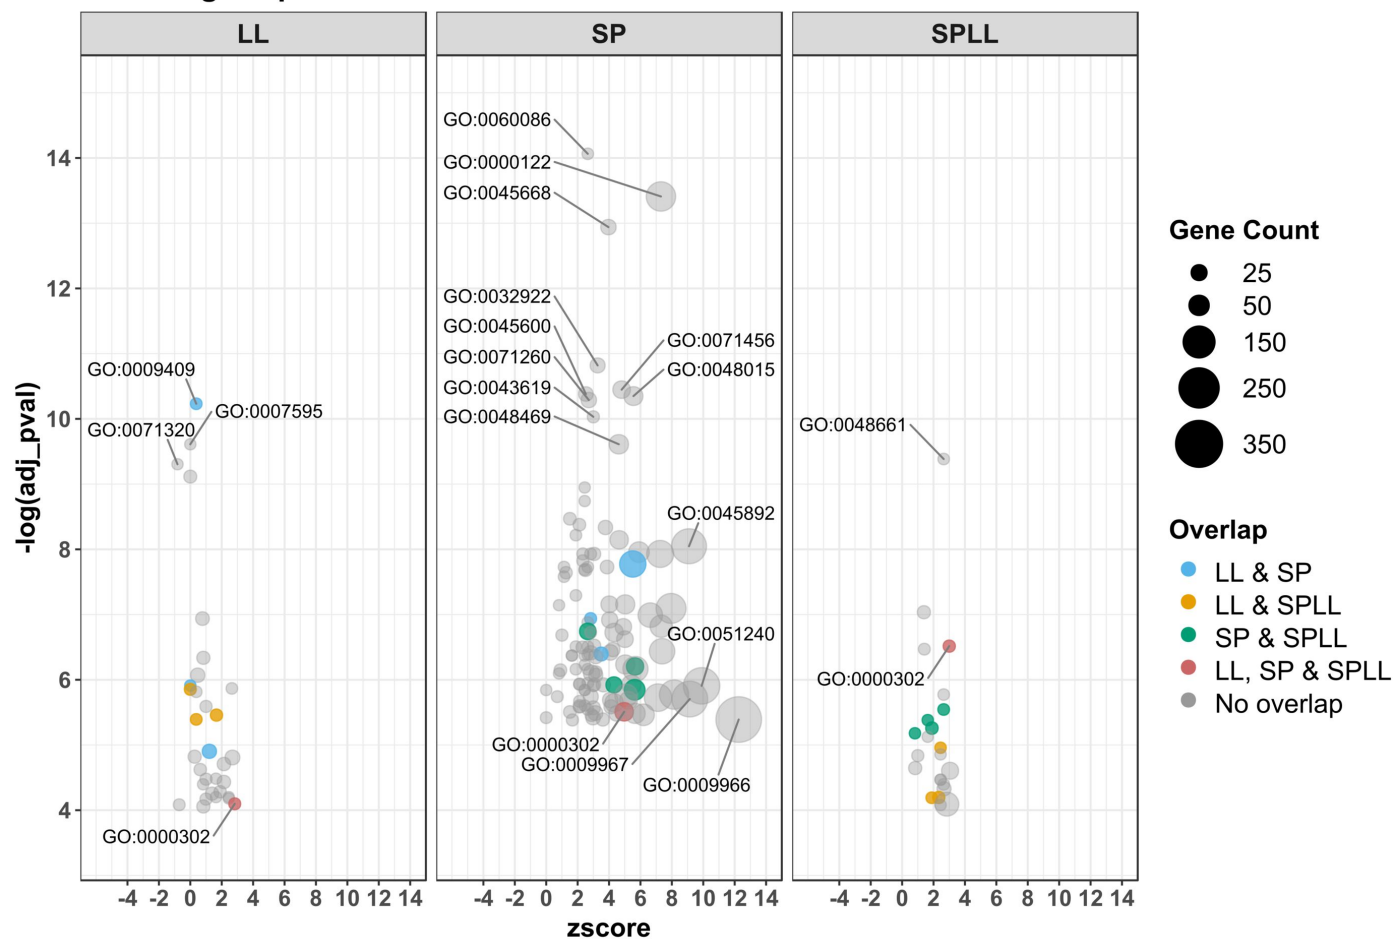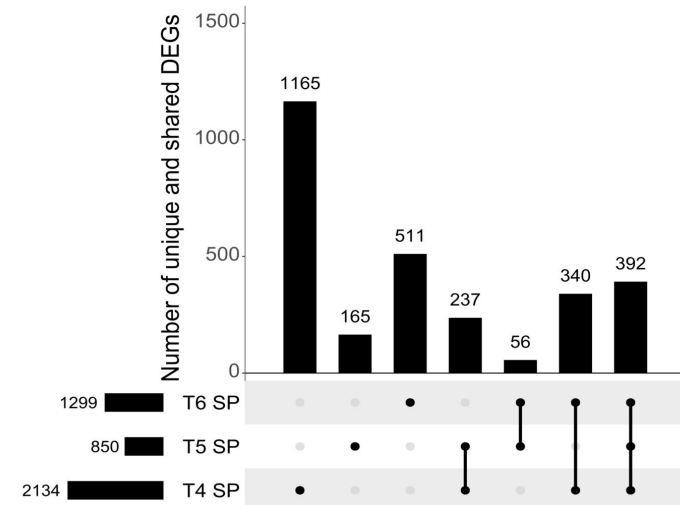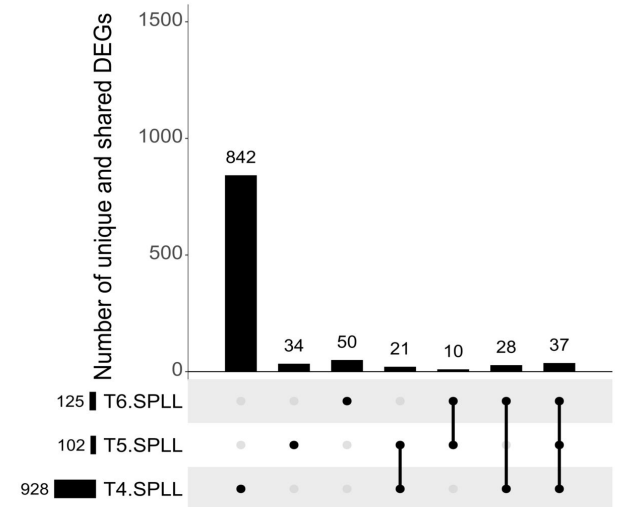

# SP

NFATC2-like LOC106572627  
**NFATC4-like LOC106600383**  
 nfatc4 LOC106569373  
 NFATC1-like LOC106588230  
 NFATC3-like LOC106562446  
 NFATC3-like LOC106587624  
 NFAT5b1 LOC106562092  
**NFAT5b2 LOC106587185**  
 NFATC2-like LOC106567114  
 NFATC2-like LOC106583670  
**NFATC3-like LOC106561519**  
 NFATC3-like LOC106573250  
 NFATC1-like LOC106605067  
 NFATC1-like LOC106583607  
 NFATC1-like LOC106569777  
 nfatc2ip LOC106600743  
**NFAT5a1 LOC106561332**  
 NFAT5a2 LOC106573386

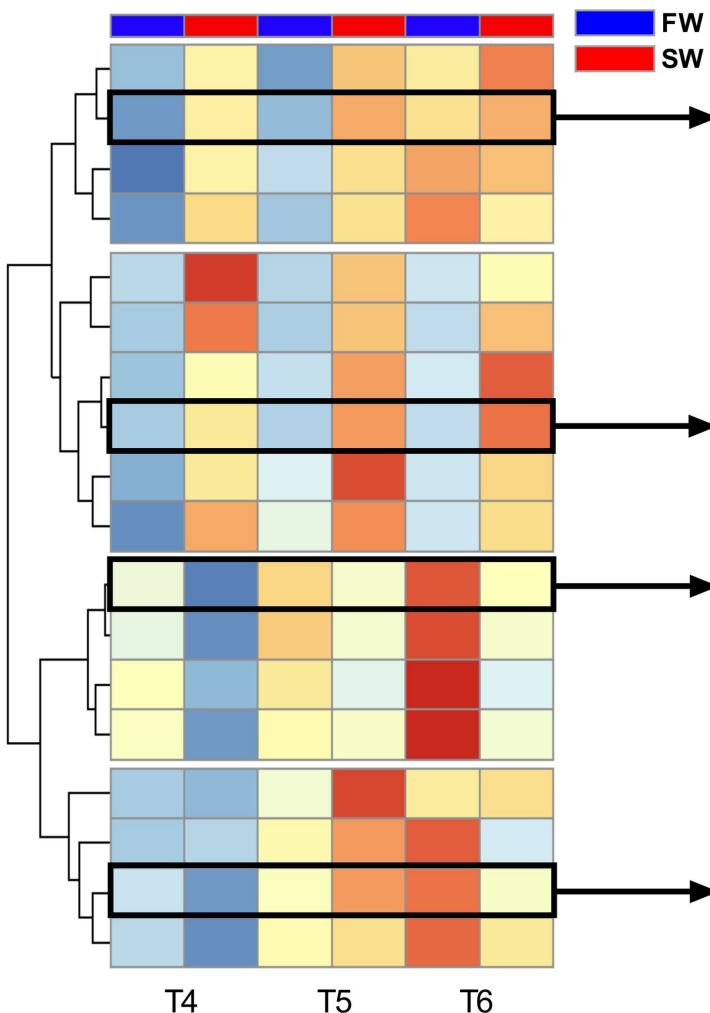

-1.5 -1 -0.5 0 0.5 1 1.5

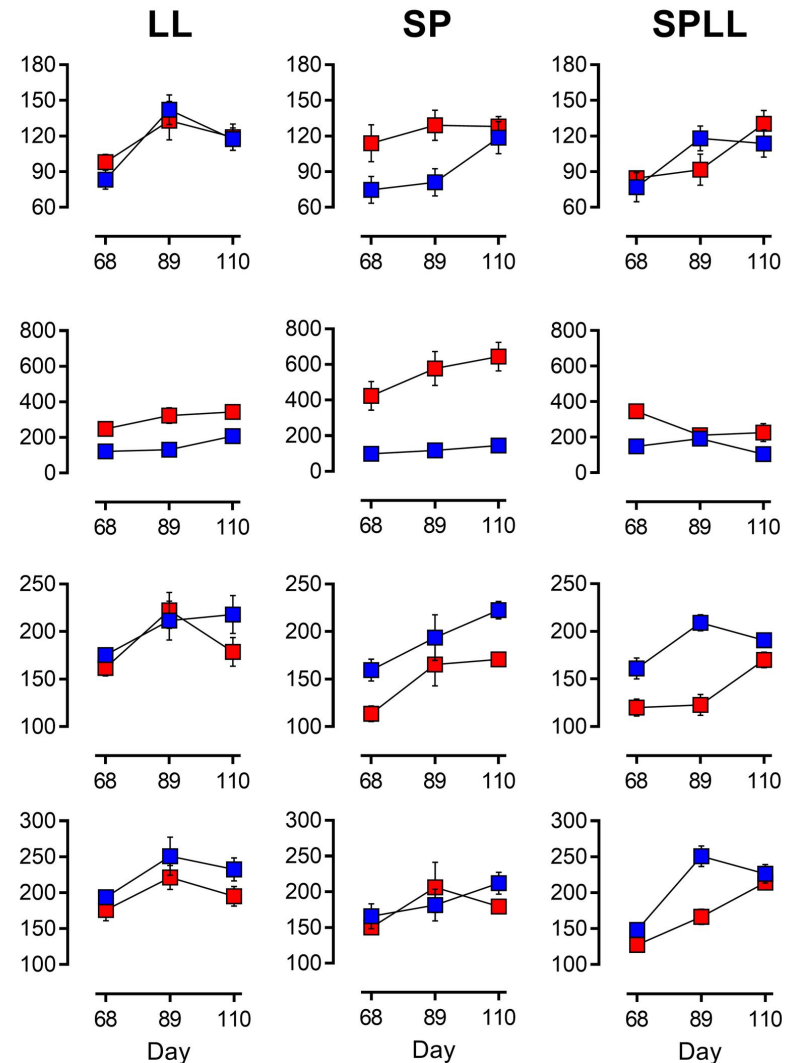

**A)**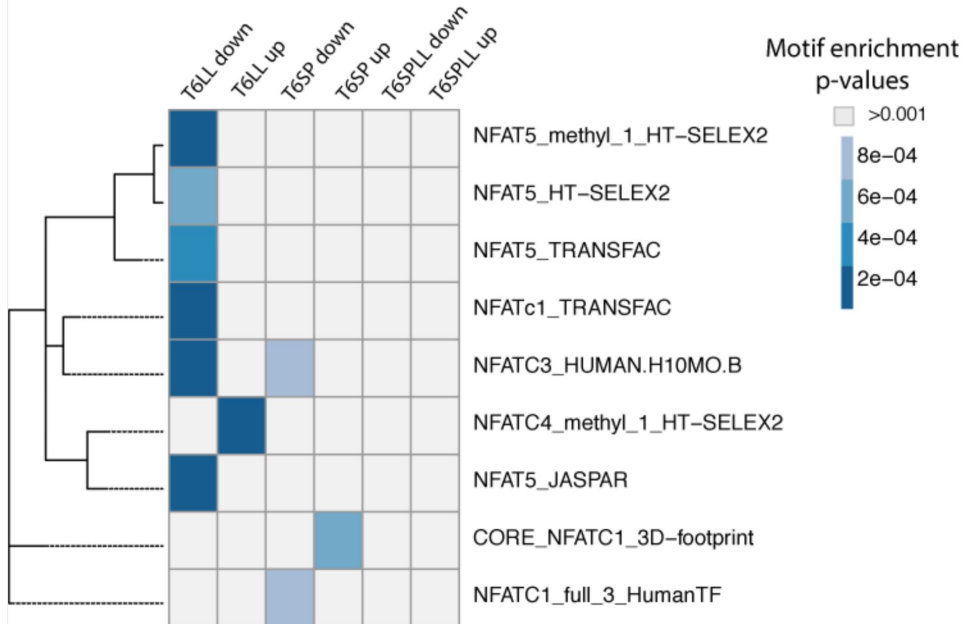**B)**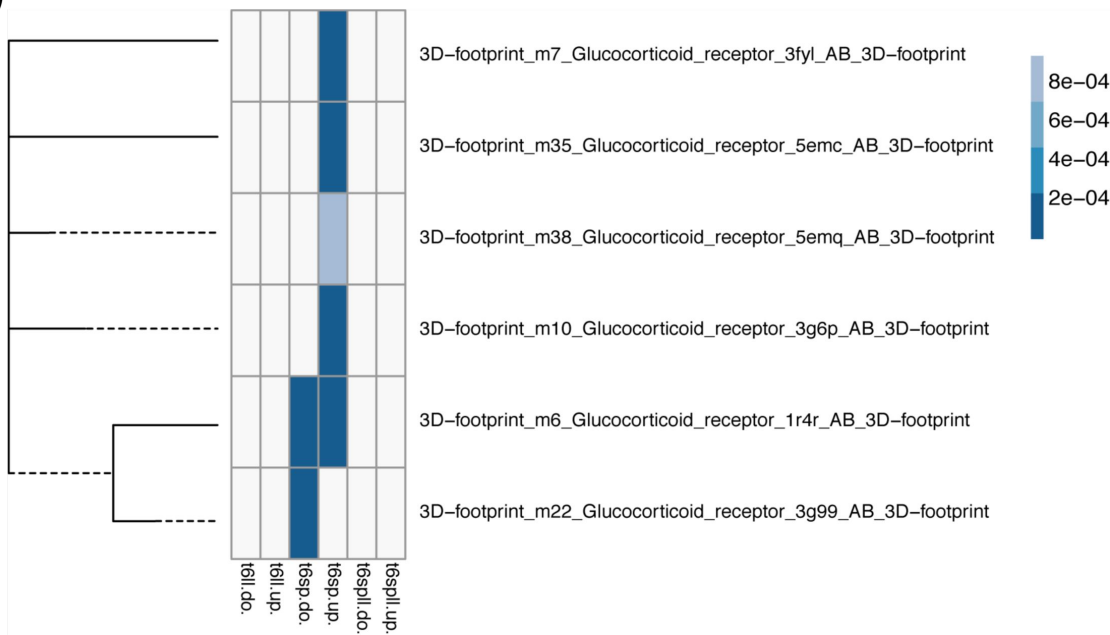

Source: http://biorxiv.org/content/10.1101/2020.03.24.006510v1.full.pdf
